# Supplementary material for: Exploring the acceptability of a ‘limited patient consent procedure’ for a proposed blood-borne virus screening programme: a Delphi consensus building technique
Source: PubMed Central journal article supplement — BMJ Open. 2017 May 29;7(5):e015373. doi: 10.1136/bmjopen-2016-015373 (PMC5729981; doi:10.1136/bmjopen-2016-015373), 2017-05-29
Supplement: bmjopen-2016-015373.draft_revisions.pdf [file bmjopen-2016-015373.draft_revisions.pdf]

# BMJ Open

## Exploring the acceptability of limited patient consent for a proposed blood-borne virus screening programme using a Delphi consensus building technique

|                                 |                                                                                                                                                                                                                                            |
|---------------------------------|--------------------------------------------------------------------------------------------------------------------------------------------------------------------------------------------------------------------------------------------|
| Journal:                        | <i>BMJ Open</i>                                                                                                                                                                                                                            |
| Manuscript ID                   | bmjopen-2016-015373                                                                                                                                                                                                                        |
| Article Type:                   | Research                                                                                                                                                                                                                                   |
| Date Submitted by the Author:   | 02-Dec-2016                                                                                                                                                                                                                                |
| Complete List of Authors:       | Crane, Denise; Durham University School of Medicine Pharmacy and Health,<br>Henderson, Emily J.; Durham University School of Medicine Pharmacy and Health<br>Chadwick, David; South Tees NHS Trust, Medical Epidemiology and Biostatistics |
| <b>Primary Subject Heading</b>: | HIV/AIDS                                                                                                                                                                                                                                   |
| Secondary Subject Heading:      | Health services research, Infectious diseases, Public health, Qualitative research                                                                                                                                                         |
| Keywords:                       | Health policy < HEALTH SERVICES ADMINISTRATION & MANAGEMENT, HIV & AIDS < INFECTIOUS DISEASES, Public health < INFECTIOUS DISEASES, PUBLIC HEALTH, QUALITATIVE RESEARCH                                                                    |
|                                 |                                                                                                                                                                                                                                            |

SCHOLARONE™  
Manuscripts

Only

1  
2  
3 **Exploring the acceptability of limited patient consent for a proposed blood-borne virus screening**  
4 **programme using a Delphi consensus building technique**  
5  
6  
7  
8  
9  
10  
11  
12  
13

14 **Corresponding Author:**

15  
16  
17 Denise Crane, Centre for Public Policy and Health, School of Medicine Pharmacy and Health,  
18  
19 Durham University, Queens Campus, Stockton on Tees, TS17 6BH, United Kingdom.  
20

21  
22 Email: [denise.crane@durham.ac.uk](mailto:denise.crane@durham.ac.uk) Tel: 01278 723712.  
23  
24

25 **Co Authors:**

26  
27  
28 Emily J Henderson, Centre for Public Policy and Health, School of Medicine Pharmacy and Health,  
29  
30 Durham University, Queens Campus, Stockton on Tees, TS17 6BH, United Kingdom.  
31

32  
33 David R Chadwick, Centre for Clinical Infection, The James Cook University Hospital, Middleborough,  
34  
35 TS4 3BW, United Kingdom.  
36  
37  
38  
39  
40  
41  
42  
43  
44  
45  
46  
47  
48  
49  
50  
51  
52

53 Word count: 3385  
54  
55  
56  
57  
58  
59  
60

**ABSTRACT**

**Objective:** To identify components of a proposed population blood-borne virus (BBV) screening programme and its associated consent procedure that both the public and health practitioners (HPs) would find acceptable. The proposed BBV screening system would aim to reduce late diagnosis of BBVs and be used in patients undergoing routine blood tests, potentially aided by risk stratification software to target individuals at higher risk of infection.

**Design:** A Delphi technique was used to build consensus amongst two separate groups, public participants and HPs in England.

**Methods:** A survey incorporating vignettes was developed, with input from an external panel of experts. Participants were asked to complete 3 rounds of the survey, rating statements on a 4 point Likert scale, covering issues around stigma and sensitivity, the use of risk stratification algorithms, and limited patient consent (i.e. pre-informed of the option to 'opt-out'). Consensus was defined as >70% of participants agreeing or disagreeing with each statement.

**Results:** Over 3 rounds, 46 public participants and 37 HPs completed the survey. Consensus was achieved amongst both groups in terms of acceptability of the screening programme, using patient data to risk-stratify screening algorithms, and the need to obtain some form of consent around the time of drawing blood.

**Conclusions:** This study found that the special protected status of HIV in England is not only longer deemed necessary today but hinders appropriate care, and proposes a novel "limited and antecedent" consent procedure that could be implemented in future screening programmes.

**ARTICLE SUMMARY****Strengths**

- The special protected status of HIV is no longer necessary and hinders appropriate health care.
- Proposal of a novel consent procedure that could be implemented in future screening programmes.

**Limitations**

- Small sample size.
- Results limited to England.

**KEYWORDS**

HIV, hepatitis B, hepatitis C, screening, testing, consensus building, consent

## INTRODUCTION

Globally around 47% of people living with HIV (PLWH) in 2014 were not aware they were infected [1]. The UNAID '90-90-90' target [1], with the ambition that 90% of PLWH will know their HIV status by 2020, is unlikely to be achieved, especially in some countries with relatively low economic development. The situation for the other two main blood-borne viruses (BBV), hepatitis B (HBV) and hepatitis C (HCV), is worse in terms of levels of undiagnosed infections [2-7]. Failure of timely diagnoses of HIV or other BBVs leads to continued transmission of infections as well as worse clinical outcomes. Late diagnosis of HIV is associated with a 10-fold higher risk of death in the year after diagnosis than early diagnosis [8]. Late diagnosis of HBV or HCV is also associated with higher mortality, due to liver cirrhosis, liver failure and liver cancer. Most HCV infections can now be cured, and both HBV and HIV infections controlled with antiviral therapy, if detected sufficiently early with a good prognosis for most patients.

In many highly economically developed countries reliable tests to diagnose BBVs have been widely available since the 1980s and early 1990s. In the case of HIV, testing has been viewed differently to tests for other infections or serious medical conditions; often it requires specific consent from individuals for the test, a process termed 'HIV exceptionalism' [9]. This stemmed historically from when HIV was an untreatable disease [10] and carried much social stigma, as HIV was widely associated with men who have sex with men (MSM) and intravenous drug users [11]. Despite improvements in health outcomes, knowledge that HIV can infect any demographic group and attitudes towards MSM, such stigma still remains, both amongst health practitioners and the public. As a result, attempts to screen for HIV infections more widely, which rely on health practitioners to identify patients potentially at risk, have been hindered. Moreover, the necessity of obtaining specific consent for HIV testing has remained an additional barrier to wider or universal screening. Despite this, HIV testing has become more normalised over the last decade, with the introduction of 'opt-out' HIV testing [9, 12], self-testing kits and the recommendations for universal testing in some

1  
2  
3 clinical settings, particularly in pregnant women and patients attending sexually transmitted  
4 infection (STI) clinics [10]. Testing coverage in other clinical settings has been less good.  
5  
6

7  
8 Studies in the UK have shown in patients presenting with advanced HIV infection, that high  
9 proportions attended primary care or other healthcare facilities with indicator conditions in the 1-2  
10 years prior to diagnosis, but were not tested [13-16]. Recognised barriers to more widespread HIV  
11 testing by healthcare workers include failure to identify risk factors, lack of training or knowledge,  
12 and concerns that a patient may be offended if a test is recommended [17, 11]. Efforts to increase  
13 HIV testing in clinical settings, such as Emergency Departments, have been partially effective,  
14 however required significant additional resources and are difficult to maintain [13-15]. Even when  
15 programmes have been implemented to establish routine HIV or BBV testing in Emergency Rooms,  
16 most programmes have not managed to increase the proportion of patients tested to above 50%  
17 [13-16].  
18  
19

20  
21 New approaches to increase HIV and BBV testing and reduce undiagnosed infections and late  
22 diagnosis are needed. Moreover, approaches to testing which do not require specific consent for HIV  
23 tests are likely to simplify screening and increase testing rates. In many highly economically  
24 developed countries, for example the UK, around half of the population have a blood test of some  
25 form every year, providing a potential opportunity for BBV testing via a population screening  
26 strategy [18]. Such a process might be used for universal screening, or to target only patients  
27 identified as being at higher risk of BBV infection, through risk stratification, in order to make testing  
28 cost-effective. Risk stratification would most effectively be performed by algorithms in computer  
29 physician order entry (CPOE) systems which might also interact with electronic patients records  
30 (EPR) or other computer health systems. Such software algorithms might identify those at higher risk  
31 on the basis of patient demographic characteristics, specific data or diagnostic codes in EPRs,  
32 previous abnormal test results (e.g. lymphopenia or raised ALT) or from specific tests being ordered  
33 on CPOEs (e.g. syphilis serology). However, gaining specific consent for BBV screening from  
34  
35  
36  
37  
38  
39  
40  
41  
42  
43  
44  
45  
46  
47  
48  
49  
50  
51  
52  
53  
54  
55  
56  
57  
58  
59  
60

1  
2  
3 individuals at the point of drawing blood in such a system would be challenging. Even when using  
4  
5 the 'opt-out' approach, many physicians would find the requirement to obtain specific consent from  
6  
7 all patients who might be selected for screening onerous, given the time needed to counsel some  
8  
9 patients. One alternative would be to gain limited consent, whereby patients are notified in advance  
10  
11 via written communication that their blood samples may be tested for BBVs, and also given the  
12  
13 opportunity to 'opt-out' of the screening programme. In this case, patients would not be asked to  
14  
15 consent specifically for HIV/BBV testing by the healthcare practitioner directly. Such a method of  
16  
17 gaining limited consent might be viewed as both practical and reasonable, particularly given that the  
18  
19 benefit of identifying people with undiagnosed BBV infections applies not only to their individual  
20  
21 health, but also to society via reducing BBV transmission. However, it has yet to be determined  
22  
23 whether this approach of limited consent would be considered acceptable. The aim of this study was  
24  
25 to identify components of a BBV population screening programme and associated consent  
26  
27 procedure that both the public and health practitioners would find acceptable.  
28  
29

## 30 31 32 **METHODS**

### 33 34 35 **Study Design**

36  
37 The study was designed using a Delphi method, a consensus-building technique that has been used  
38  
39 widely in various areas of medical practice to achieve consensus amongst HPs and patients, on  
40  
41 acceptable and effective medical practice and health service provisions [19, 20]. An online survey  
42  
43 was created utilising Bristol Online Survey ([www.onlinesurveys.ac.uk](http://www.onlinesurveys.ac.uk)) entailing 4 sections with  
44  
45 vignettes and subsequent statements encompassing our research questions. Free text comment  
46  
47 boxes at the end of each section allowed participants to provide additional comments and feedback.  
48  
49

### 50 51 52 **Patient Involvement**

53  
54 There is no patient involvement in this study.  
55  
56  
57  
58  
59  
60

### Participants and recruitment

Members of the public were randomly selected through a commercial email database covering potential participants across the whole of the UK and HPs were purposefully selected through relevant English National Health Service (NHS) organisations. HPs were deliberately selected from a wide range of relevant medical specialists, general practitioners and specialist nurses. Potential participants were emailed with a description of the study and a link to the online survey and asked if they would be willing to take part. Public participants were offered a financial incentive of a £5 Amazon gift voucher after each round to improve recruitment. In Delphi exercises, 50 respondents is generally considered to be sufficient to be representative of public opinion and 30 respondents sufficient to be representative of expert opinion to enable consensus to be achieved [20-25]. It is also normally anticipated that a 20% drop-out rate should be expected over the 3 rounds [25, 26]. Therefore we sought to recruit 75 members of the public and 50 HPs to be able to achieve the target sample size at the end of 3 rounds.

### Survey development

The survey was developed by the research team with input from an external advisory panel comprising national experts in bio-ethics, medicine, Delphi methodology and PLWH. Based on our review of the literature, we developed three general topic areas relevant to the proposed screening programme: stigma and sensitivity, the use of computer selection (risk stratification) algorithms/programs for BBV screening, and patient consent. Vignettes were written to illustrate issues in each area, an approach to Delphi used previously to explore ethical dilemmas [23]. The vignettes comprised short hypothetical scenarios encompassing the general topic areas that may be experienced by the public and health practitioners (see supplementary file) followed by a series of statements. Two statements were constructed for each question, in order to balance negative and positive responses. Participants were asked to rate each statement using a 4-point Likert scale with a



1  
2  
3 response of 'strongly agree', 'agree', 'disagree' and 'strongly disagree.' Statements were assessed by  
4  
5 the advisory panel for readability and relevance.  
6  
7

### 8 **Data collection**

9  
10 Data were collected over three rounds; the process is summarised in Figure 1. Round 1 responses  
11  
12 were analysed, and areas requiring further investigation in Round 2 were identified. Feedback from  
13  
14 Rounds 1 and 2 was provided to the participants, with pie charts indicating group consensus and  
15  
16 disagreement as well as the respondents' original answers. Respondents were then asked to  
17  
18 reconsider their original answer in light of the group's responses.  
19  
20  
21  
22  
23

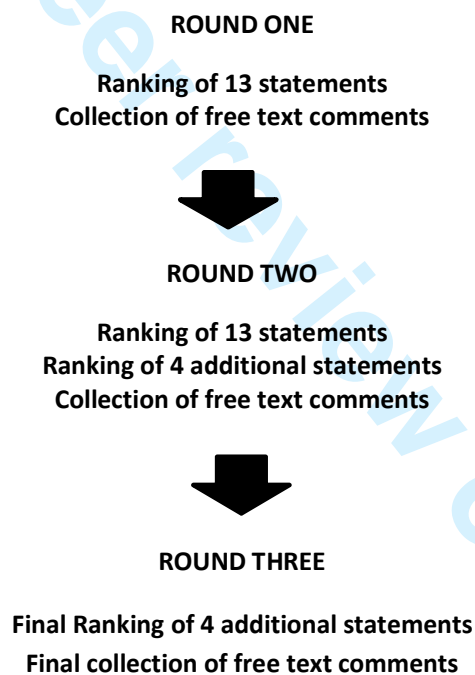

44  
45  
46  
47 **Figure 1. The three Delphi rounds**

48  
49  
50  
51  
52 Free text comment boxes were provided at the end of each section for participants to provide any  
53  
54 further comments, and we gathered data on participants' age, gender and ethnicity. To help  
55  
56  
57  
58  
59  
60

participants understand the proposed BBV screening programme, we embedded a link in the online survey to an informational YouTube video developed by DC [27].

### Data analysis

Following completion of the third and final round responses were analysed to establish areas of consensus and areas where consensus had not been achieved. In the final analysis percentages were narrowed down to agree (strongly agree and agree) and disagree (strongly disagree and disagree); percentages of agree/disagree were calculated for each statement using SPSSv10. Consensus was defined as >70% of participants agreeing/strongly agreeing or disagreeing/strongly disagreeing with each statement. A modified continuous comparative method of thematic analysis was used to analyse the free text comments in order to identify themes, allowing the determination of whether a comment made by one participant was a commonly shared or individual opinion [28].

### RESULTS

In Round 1, a total of 119 participants (68 public and 51 HP participants) were recruited; in Round 2, 51 public and 40 HPs completed the survey; in Round 3, 46 public and 37 HPs completed the survey. Within the final sample of HP respondents 55% were hospital doctors, 23% general practitioners and 12% specialist nurses; Table 1 shows the demographic data collected for the public and HP participants. Table 2 summarises consensus achieved in all three rounds, and Table 3 summarises common themes collected from all the participants free text comments.

| Socio-demographic Questions | Public (n=46) | HP (n=37) |
|-----------------------------|---------------|-----------|
| <b>AGE</b>                  |               |           |
| Age Range                   | 20-73         | 29-61     |
| Mean Age                    | 33            | 44        |
| <b>GENDER</b>               |               |           |
| Male                        | 21 (46%)      | 22 (59%)  |

|                                 |          |          |
|---------------------------------|----------|----------|
| Female                          | 25 (54%) | 15 (41%) |
| <b>ETHNICITY (self-defined)</b> |          |          |
| White British                   | 33 (72%) | 31 (84%) |
| Asian                           | 7 (15%)  | 3 (8.5%) |
| Indian                          | 3 (7%)   | 1 (2.5%) |
| Chinese                         | 1 (2%)   | 1 (2.5%) |
| American                        | 2 (4%)   | 0        |
| African                         | 0        | 1 (2.5%) |

Table 1. Participants' demographic data

| STATEMENT                                                                                                                                                   | ROUND 1 |     |          |     | ROUND 2 |     |          |      | ROUND 3    |            |          |             |
|-------------------------------------------------------------------------------------------------------------------------------------------------------------|---------|-----|----------|-----|---------|-----|----------|------|------------|------------|----------|-------------|
|                                                                                                                                                             | AGREE   |     | DISAGREE |     | AGREE   |     | DISAGREE |      | AGREE      |            | DISAGREE |             |
|                                                                                                                                                             | Public  | HPs | Public   | HPs | Public  | HPs | Public   | HPs  | Public     | HPs        | Public   | HPs         |
| <b>Stigma and sensitivity</b>                                                                                                                               |         |     |          |     |         |     |          |      |            |            |          |             |
| 1. HIV tests should no longer have a special status and should be handled like any other routine blood tests                                                | 85%     | 75% | 15%      | 25% | 80%     | 84% | 20%      | 16%  | <b>80%</b> | <b>88%</b> | 20%      | 12%         |
| 2. Because having HIV may make people feel they have a stigma, HIV tests should only be carried out in cases where the doctor will not offend the patient   | 57%     | 6%  | 43%      | 94% | 60%     | 0%  | 40%      | 100% | 60%        | 2%         | 40%      | <b>98%</b>  |
| 3. It is acceptable for a health practitioner not to recommend that a patient has a HIV test if the health practitioner feels too uncomfortable             | 40%     | 2%  | 60%      | 98% | 41%     | 0%  | 59%      | 100% | 41%        | 0%         | 59%      | <b>100%</b> |
| <b>The use of computer selection programmes for screening</b>                                                                                               |         |     |          |     |         |     |          |      |            |            |          |             |
| 4. The BBV screening programme is acceptable because detecting infections more often will benefit not only individual patients but also the wider community | 75%     | 67% | 25%      | 33% | 78%     | 69% | 22%      | 31%  | <b>78%</b> | <b>75%</b> | 22%      | 25%         |
| 5. The BBV screening programme is not acceptable because it tests people for BBVs without their consent                                                     | 51%     | 53% | 49%      | 47% | 57%     | 63% | 43%      | 37%  | 57%        | <b>70%</b> | 43%      | 30%         |

|                                                                                                                                                                                                          |     |     |     |     |     |     |     |     |            |            |     |            |
|----------------------------------------------------------------------------------------------------------------------------------------------------------------------------------------------------------|-----|-----|-----|-----|-----|-----|-----|-----|------------|------------|-----|------------|
| 6. The computer programme should not be able to use information on the patient (for example age, post code or results of a previous test) to select blood samples for BBV testing                        | 60% | 45% | 40% | 55% | 49% | 26% | 51% | 74% | 49%        | 22%        | 51% | <b>78%</b> |
| 7. A screening programme for BBV infections would help remove the burden of having to identify and counsel patients for HIV and BBV testing                                                              | 76% | 49% | 34% | 51% | 75% | 37% | 25% | 63% | <b>75%</b> | 32%        | 25% | 68%        |
| 14. Assuming patients' data were fully secure, a screening programme for BBV infections should be able to use patient information to select those most at risk of infections for screening               | -   | -   | -   | -   | 74% | 84% | 26% | 16% | <b>72%</b> | <b>98%</b> | 28% | 2%         |
| 15. A screening programme for BBV infections should not be allowed to use patient information to select those at most risk of infections even assuming the data was fully secure                         | -   | -   | -   | -   | 63% | 16% | 37% | 84% | 63%        | 6%         | 37% | <b>94%</b> |
| <b>Patient consent</b>                                                                                                                                                                                   |     |     |     |     |     |     |     |     |            |            |     |            |
| 8. Posters and leaflets informing patients that they may be screened for BBV infections is an acceptable way to get consent                                                                              | 70% | 53% | 30% | 47% | 57% | 42% | 43% | 58% | 57%        | 35%        | 43% | 65%        |
| 9. Using posters and leaflets is not enough. The health practitioner should still speak to patients and tell them that their blood may be tested for BBV infections and get their fully informed consent | 83% | 74% | 17% | 26% | 80% | 84% | 20% | 16% | <b>80%</b> | <b>85%</b> | 20% | 15%        |
| 10. Any loss in patient choice is outweighed by the benefit of having infections diagnosed earlier                                                                                                       | 75% | 51% | 25% | 49% | 71% | 26% | 29% | 74% | <b>71%</b> | 32%        | 29% | 68%        |

|                                                                                                                                                                                                                                            |     |     |     |     |     |     |     |     |     |     |     |     |
|--------------------------------------------------------------------------------------------------------------------------------------------------------------------------------------------------------------------------------------------|-----|-----|-----|-----|-----|-----|-----|-----|-----|-----|-----|-----|
| 11. There is not adequate information for a patient to decline BBV testing for this screening programme                                                                                                                                    | 68% | 39% | 32% | 61% | 67% | 47% | 33% | 53% | 67% | 42% | 33% | 58% |
| 12. Offering a mix of types of consent to patients getting routine blood tests is more acceptable than offering limited consent only                                                                                                       | 85% | 90% | 15% | 10% | 75% | 84% | 25% | 16% | 75% | 90% | 25% | 10% |
| 13. Even though it may cost more money overall, offering a mix of types of consent to patients getting routine blood tests is the most acceptable way of getting consent                                                                   | 78% | 86% | 22% | 14% | 75% | 84% | 25% | 16% | 75% | 90% | 25% | 10% |
| 16. This system of informing patients of the screening programme and permitting opt-out is sufficient for ensuring limited consent and patient awareness                                                                                   | -   | -   | -   | -   | 69% | 68% | 31% | 32% | 59% | 62% | 41% | 38% |
| 17. This system is not sufficient for ensuring patients are aware their blood may be tested. All patients undergoing blood tests should also be asked to agree to taking part in the screening programme by a doctor or nurse practitioner | -   | -   | -   | -   | 73% | 53% | 27% | 47% | 63% | 73% | 37% | 27% |

Table 2. Frequency of responses to the survey

| Stigma and Sensitivity                               |                                                                                                                                                                                                                                         |
|------------------------------------------------------|-----------------------------------------------------------------------------------------------------------------------------------------------------------------------------------------------------------------------------------------|
| Public                                               | <p><i>"It should be carried out like any normal blood test...then the doctor couldn't be offending anyone or be embarrassed"</i></p> <p><i>"The stigma surrounding HIV would be reduced if HIV blood tests become more routine"</i></p> |
| HP                                                   | <p><i>"I feel there is a need for the position of testing to be brought in line with all other tests"</i></p> <p><i>"HIV testing would become more routine if it were offered more often"</i></p>                                       |
| The use of computer selection programs for screening |                                                                                                                                                                                                                                         |

|                        |                                                                                                                                                                                                                                                                                                                                                                                                                                                                               |
|------------------------|-------------------------------------------------------------------------------------------------------------------------------------------------------------------------------------------------------------------------------------------------------------------------------------------------------------------------------------------------------------------------------------------------------------------------------------------------------------------------------|
| Public                 | <p><i>"I don't feel comfortable with patients being selected based on age and post code...it's acceptable for tests to be run based on prior results"</i></p> <p><i>"I believe that implementing it would be a tremendous service if applied ethically and sensitively"</i></p> <p><i>"If data is secured and patients aware then it should be allowed"</i></p>                                                                                                               |
| HP                     | <p><i>"We need universal not targeted screening"</i></p> <p><i>"If we are saying that anyone can get these infections, then surely we should check everyone"</i></p> <p><i>"Testing on the basis of age etc. will miss a large proportion of the population"</i></p>                                                                                                                                                                                                          |
| <b>Patient consent</b> |                                                                                                                                                                                                                                                                                                                                                                                                                                                                               |
| Public                 | <p><i>"While the BBV programme is in the public interest, it is vital that efforts are made to inform patients of what is happening"</i></p> <p><i>"As long as the patients are fully informed there is no problem"</i></p> <p><i>"A mixture of consent and acting in the best interests of the patient would be one of the best methods to ensure wide acceptability of the programme"</i></p>                                                                               |
| HP                     | <p><i>"People are careened for many illnesses without fully informed consent, BBV should be no different"</i></p> <p><i>"Akin to random testing for diabetes, you may inform the patient that the test is happening but would not necessarily discuss all the subsequent effects and treatments"</i></p> <p><i>"I am sure that as patients become more aware of this happening to their bloods, they will be more accepting of it and ultimately see it as 'routine'"</i></p> |

**Table 3. Common themes from participants free text comments.**

### **Stigma and sensitivity**

There was clear consensus for this section. The public and HPs agreed that HIV should no longer have a special status and should be handled like any other routine blood tests. HPs unanimously disagreed that feelings of discomfort or offending patients was an acceptable reason not to offer HIV tests.

### **The use of computer selection programs for screening:**

The public and HPs both agreed that a BBV screening programme would detect infections more often and would be beneficial to individual patients and society more widely. However, HPs contradicted themselves by also agreeing that the BBV screening programme was not acceptable as it 'tested patients without their consent.' Despite this HPs felt that computer programmes should be

1  
2  
3 able to use patients' information for risk stratification. Similarly, the public agreed that the screening  
4  
5 programme would help to remove the burden of identifying and counselling patients. Free text  
6  
7 comments from Round 1 generally supported the concept of using patient data for risk stratification,  
8  
9 so long as there were safeguards to ensure data were secure. In Round 2, a follow up question  
10  
11 (statements 14 and 15) confirmed that use of patient data for these purposes would be acceptable  
12  
13 assuming data were secure.

### 14 15 16 17 **Patient consent**

18  
19  
20 Consensus was achieved in both groups on the point that it was not enough to inform patients that  
21  
22 they may be tested for BBVs via a poster or leaflets alone. Both the public and the HPs agreed that  
23  
24 getting fully-informed consent for BBV testing was ideal. However, the public also agreed that any  
25  
26 loss in patient choice (i.e. autonomy) would be outweighed by having infections diagnosed earlier.  
27  
28 For the option to offer a mix of consent options, rather than limited consent alone, the answers  
29  
30 were irreconcilable, with the majority of both groups agreeing with the two opposing statements.  
31  
32 However, this likely instead reflects views that reducing health care costs should not be prioritized  
33  
34 over obtaining sufficient consent. Free text comments in this section mostly supported the proposed  
35  
36 consent process, but emphasised the need for all patients to be informed that their blood samples  
37  
38 might be tested. Two new statements (16 and 17) were added in Round 2 to try and establish  
39  
40 consensus regarding the proposed method of consent. There was consensus amongst HPs that  
41  
42 patients should still be informed their blood might be tested for BBVs at the point of drawing blood.  
43  
44

### 45 46 **DISCUSSION**

47  
48  
49 This study was developed to examine attitudes of the public and HPs towards two mechanisms of  
50  
51 improving detection of HIV and BBV infections, the use of risk stratification algorithms to detect  
52  
53 patients at higher risk of infection and limited consent. We used an iterative Delphi technique with  
54  
55 the addition of new statements in subsequent rounds to clarify issues raised after responses to prior  
56  
57 statements. We found there was general agreement amongst both participant groups around  
58  
59  
60

1  
2  
3 ending any persisting exceptionalism in relation to HIV testing. There was also consensus that a BBV  
4  
5 screening programme would be beneficial and it was reasonable to use patients' medical data to  
6  
7 target those at higher risk of infection, assuming data were protected. In respect to our investigation  
8  
9 of limited consent, there was some ambiguity within both groups, and thus consensus on this point  
10  
11 was not easily discernible, indicating this form of consent posed some ethical dilemma. However,  
12  
13 through iteration of rounds and use of free text boxes, a new and acceptable form of a consent  
14  
15 process emerged from this Delphi study. We call this process 'limited and antecedent' consent,  
16  
17 which involves providing advanced notification to all patients that their blood may be tested, with a  
18  
19 reminder from a HP when blood is drawn, along with the option of opting out. This Delphi study  
20  
21 achieved a large national English sample from a range of HPs involved in BBV testing and the general  
22  
23 public. Its finding of acceptability of a novel consent procedure, and implications for the  
24  
25 development of a new BBV screening programme, however may be applicable only to the English  
26  
27 social context.  
28  
29

30  
31  
32 Given the apparent sensitivity that still exists around offering HIV testing, it is interesting that both  
33  
34 public participants and a broad range of medical and nursing HPs were comfortable with the concept  
35  
36 of not only reducing the exceptionalism that has traditionally been associated with HIV testing, but  
37  
38 also with the concept of limited and antecedent consent. In devising the statements in the survey,  
39  
40 we deliberately wanted to test how far each group might consider balancing the primacy of patients'  
41  
42 autonomy, in terms of deciding whether to be tested for BBVs, over the competing ethical principal  
43  
44 of utilitarianism. The utilitarian argument in favour of universal or targeted screening for BBVs is that  
45  
46 society as a whole benefits if more people are diagnosed with BBV infections since transmission is  
47  
48 reduced, fewer individuals are infected and healthcare costs are reduced. Unlike some other  
49  
50 screening programmes, the benefits of the proposed BBV screening programme would extend more  
51  
52 widely than to just those individuals found to be infected with BBVs. Another significant difference is  
53  
54 that given the frequency with which patients in general have blood tests, and potential uncertainty  
55  
56 of which patients would be tested using risk stratification algorithms, obtaining specific and direct  
57  
58  
59  
60



1  
2  
3 consent for testing each time a patient has blood drawn is impractical. Hence obtaining limited and  
4  
5 antecedent consent from the target adult population with the clear option of opting out of testing  
6  
7 proves both practical as well as acceptable based on our study. There is a precedent for this form of  
8  
9 consent in the UK Clinical Practice Research Database [29], where all adults in the areas contributing  
10  
11 medical data to this system are informed by letter that their fully-anonymised data may be used for  
12  
13 research studies or service planning unless they decide to 'opt-out' of the system. One recent study  
14  
15 screening for BBVs in Emergency Departments has also successfully employed a pragmatic and  
16  
17 limited consent process [16]. The use of risk stratification software to identify patients at higher risk  
18  
19 of BBV infections has recently been employed in the UK-based HepCATT trial, as part of targeted  
20  
21 case finding for hepatitis C infection in primary care [30]. We believe that combining such risk  
22  
23 stratification software to target screening with a practical and acceptable consent process has  
24  
25 considerable potential to reduce the number of individuals with undiagnosed BBVs in countries with  
26  
27 suitable health infrastructure. Further research into its design and implementation would be  
28  
29 needed.  
30  
31

32  
33  
34 A recent UK study found that adding HBV/HCV tests to routine HIV tests in Emergency Departments  
35  
36 resulted in significant numbers of new diagnoses of viral hepatitis as well as HIV, with the cost per  
37  
38 new diagnosis well below the threshold for cost-effectiveness [13]. This adds weight to the concept  
39  
40 of screening specific or general populations for all three BBVs, rather than just HIV. Changing to the  
41  
42 new consent process led to testing rates increasing from below 5% of all patients to consistently  
43  
44 over 60% with mean numbers of positive results increasing from less than 1 per week to 4 per week  
45  
46 [16]. The process of obtaining consent in the present study may be viewed as a paradigm for future  
47  
48 screening programmes or studies exploring alternative approaches to increase BBV testing. Our  
49  
50 study adds to the evidence suggesting that both the public as well as HPs may be willing to accept  
51  
52 limited and antecedent consent, where HPs do not need to obtain specific consent for HIV or BBV  
53  
54 testing, given the benefits of earlier diagnosis of BBV infections both to individuals as well as society  
55  
56 in general.  
57  
58  
59  
60

1  
2  
3 HIV related issues, such as treatment, and social stigma, have developed over the past couple of  
4  
5 decades, and associated BBV screening programmes should reflect these advances. This study found  
6  
7 that the special protected status of HIV in England is not only longer deemed necessary today but  
8  
9 hinders appropriate care, and proposes a novel consent procedure that could be implemented in  
10  
11 future screening programmes.  
12

### 13 14 **ACKNOWLEDGEMENTS**

15  
16  
17 We are very grateful to the doctors, nurses and public participants who responded to our survey,  
18  
19 Charlotte Jacobs our study coordinator and Robbie Horton who developed the YouTube video. We  
20  
21 are indebted to the following expert advisors who assisted with the survey development and  
22  
23 interpretation of responses: Dr Alasdair MacSween, Teesside University; Dr Elaine Kirk, GP at NHS  
24  
25 England; Professor Rebecca Bennett, Manchester University, Professor Jackie Leach Scully,  
26  
27 Newcastle University; Neil Campling and Alex Murray.  
28  
29  
30

### 31 **COMPETING INTERESTS**

32  
33  
34 No competing interests.  
35  
36

### 37 **FUNDING**

38  
39  
40 South Tees Infectious Diseases Research Fund (8072SA).  
41  
42

### 43 **ETHICAL APPROVAL**

44  
45  
46 This study received ethical approval from the Durham University School of Medicine, Pharmacy and  
47  
48 Health's Sub-Ethics Committee. All data were treated according to the Data Protection Act 1998.  
49  
50

### 51 **DATA SHARING STATEMENT**

52  
53  
54 No additional data available.  
55  
56  
57  
58  
59  
60

### CONTRIBUTORSHIP STATEMENT

Denise Crane, Emily J Henderson and David R Chadwick were all responsible for the conception and design of this study, interpretation of the data, drafting, revising and approval of the final document.

Denise Crane was responsible for recruitment of the participants, collection and analysis of the data.

### COPYRIGHT

The Corresponding Author has the right to grant on behalf of all authors and does grant on behalf of all authors, a worldwide licence to the Publishers and its licensees in perpetuity, in all forms, formats and media (whether known now or created in the future), to i) publish, reproduce, distribute, display and store the Contribution, ii) translate the Contribution into other languages, create adaptations, reprints, include within collections and create summaries, extracts and/or, abstracts of the Contribution, iii) create any other derivative work(s) based on the Contribution, iv) to exploit all subsidiary rights in the Contribution, v) the inclusion of electronic links from the Contribution to third party material where-ever it may be located; and, vi) licence any third party to do any or all of the above.

### TRANSPARENCY DECLARATION

The lead author affirms that the manuscript is an honest, accurate, and transparent account of the study being reported; that no important aspects of the study have been omitted; and that any discrepancies from the study as planned (and, if relevant, registered) have been explained.

### REFERENCES

1. Joint United Nation Programme on HIV/AIDS (UNAIDS). 90-90-90 UNAIDS - An Ambitious Treatment Target To Help End The AIDS Epidemic. UNAIDS; 2014.  
[http://www.unaids.org/sites/default/files/media\\_asset/90-90-90\\_en\\_0.pdf](http://www.unaids.org/sites/default/files/media_asset/90-90-90_en_0.pdf) (accessed 09.09.2016)

- 1  
2  
3 2. Moorman AC, Xing J, Ko S, *et al.* Late Diagnosis of Hepatitis C Virus Infection in the Chronic  
4  
5 Hepatitis Cohort Study (CHeCS): Missed Opportunities for Intervention. *Hepatology* 2015;  
6  
7 61(5):1479-1484.  
8  
9
- 10 3. Niederau, C. Chronic hepatitis B in 2014: Great therapeutic progress, large diagnostic deficit.  
11  
12 *World Journal of Gastroenterology* 2014; 20(33):11595-11617.  
13
- 14 4. Cornberg M, Razavi HA, Alberti A, *et al.* A systematic review of hepatitis C virus epidemiology  
15  
16 in Europe, Canada and Israel. *Liver International* 2011; 31(Suppl 2):30-60.  
17  
18
- 19 5. Health Protection Agency. Hepatitis C in the United Kingdom: 2013 Report. London: Health  
20  
21 Protection Services; 2013.  
22  
23
- 24 6. Public Health England. Hepatitis C in the UK: 2013 report. London: Public Health England;  
25  
26 2013.  
27  
28  
29  
30  
31 [https://www.gov.uk/government/uploads/system/uploads/attachment\\_data/file/364074/H](https://www.gov.uk/government/uploads/system/uploads/attachment_data/file/364074/Hepatitis_C_in_the_UK_2013.pdf)  
32  
33 [epatitis C in the UK 2013.pdf](https://www.gov.uk/government/uploads/system/uploads/attachment_data/file/364074/Hepatitis_C_in_the_UK_2013.pdf) (accessed 09.09.2016)  
34  
35
- 36 7. O'Leary MC, Sarwar M, Hutchinson SJ, *et al.* The prevalence of hepatitis C virus among  
37  
38 people of South Asian origin in Glasgow – Results from a community based survey and  
39  
40 laboratory surveillance. *Travel Medicine and Infectious Disease* 2013; 11(5):301-309.  
41  
42
- 43 8. McPherson S, Valappil M, Moses SE, *et al.* Targeted case finding for hepatitis B using dry  
44  
45 blood spot testing in the British-Chinese and South Asian populations of the North-East of  
46  
47 England. *Journal of Viral Hepatitis* 2013; 20(9):638-644.  
48  
49
- 50 9. Stein N. Ethics in consent for HIV testing. *The virtual mentor VM* 2009; 11(12):959-961.  
51  
52
- 53 10. Bayer R, Fairchild AL. Changing the paradigm for HIV testing – The end of exceptionalism.  
54  
55 *New England Journal of Medicine* 2006; 355(7):647-649.  
56  
57  
58  
59  
60

- 1  
2  
3 11. General Medical Council (GMC). Confidentiality: Protecting and Providing Information  
4  
5 (2000). GMC-UK-org 2004.  
6  
7  
8 [http://www.gmc-uk.org/confidentiality\\_sep\\_2000.pdf\\_25416426.pdf](http://www.gmc-uk.org/confidentiality_sep_2000.pdf_25416426.pdf) (accessed 09.09.2016)  
9  
10
- 11 12. General Medical Council (GMC). Consent: patients and doctors making decisions together.  
12  
13 GMC-UK.org 2008.  
14  
15  
16 [http://www.gmc-uk.org/static/documents/content/Consent\\_-\\_English\\_1015.pdf](http://www.gmc-uk.org/static/documents/content/Consent_-_English_1015.pdf) (accessed  
17  
18 09.09.2016)  
19  
20
- 21 13. Orkin C, Flanagan S, Wallis E, *et al.* Incorporating HIV/hepatitis B virus/hepatitis C virus  
22  
23 combined testing into routine blood tests in nine UK Emergency Departments: the “Going  
24  
25 Viral” campaign. *HIV Medicine* 2016; 17(3):222-230.  
26  
27
- 28 14. Elmahdi R, Gerver SM, Guillen GG, *et al.* Low levels of HIV test coverage in clinical settings in  
29  
30 the UK: a systematic review of adherence to 2008 guidelines. *Sexually Transmitted Infections*  
31  
32 2014; 90(2):119-124.  
33  
34
- 35 15. Hartney T, Kennedy I, Crooke P, *et al.* Expanded HIV testing in high prevalence areas in  
36  
37 England: results of a 2012 audit of sexual health commissioners. *HIV Medicine* 2014;  
38  
39 15(4):251-254.  
40  
41  
42
- 43 16. Paparello J, Hunter L, Betournay R, *et al.* Reducing the barriers to HIV testing – a simplified  
44  
45 consent pathway increases the uptake of HIV testing in a high prevalence population. *HIV*  
46  
47 *Medicine* 2016; 17(Suppl 1):9.  
48  
49
- 50 17. British HIV Association (BHIVA), British Association of Sexual Health and HIV (BASHH), British  
51  
52 Infection Society (BIS). UK National Guideline for HIV testing 2008. BHIVA.org 2008.  
53  
54  
55 <http://www.bhiva.org/documents/Guidelines/Testing/GlinesHIVTest08.pdf> (accessed  
56  
57 09.09.2016)  
58  
59  
60

18. <http://www.nhs.uk/conditions/Blood-tests/Pages/Introduction.aspx> (accessed 09.09.2016)
19. Jones J, Hunter D. Consensus methods for medical and health services research. *The British Medical Journal* 1995; 311:376-380.
20. [http://www.journalslibrary.nihr.ac.uk/\\_data/assets/pdf\\_file/0003/64839/FullReport-hta2030.pdf](http://www.journalslibrary.nihr.ac.uk/_data/assets/pdf_file/0003/64839/FullReport-hta2030.pdf) (accessed 09.09.2016)
21. Cook S, Aikens JE, Berry CA, *et al.* Development of the Diabetes Problem-Solving Measure for Adolescents. *Diabetes Educator* 2001; 27(6):865-874.
22. Rose CM, Kagan AR. The final report of the expert panel for the Radiation Oncology Bone Metastasis Work Group of the American College of Radiology. *International Journal of Radiation Oncology Biology Physics* 1998; 40(5):1117-1124.
23. Wainwright P, Gallagher A, Tompsett H, *et al.* The use of vignettes within a Delphi exercise: a useful approach in empirical ethics? *Journal of Medical Ethics* 2010; 36(11):656-660.
24. Wigton RS, Darr CA, Corbett KK, *et al.* How do community practitioners decide whether to prescribe antibiotics for acute respiratory tract infections? *Journal of General Internal Medicine* 2008; 23(10):1615-1620.
25. Henderson EJ, Rubin GP. Development of a community based model for respiratory care services. *BMC Health Services Research* 2012; 12:193.
26. Akins RB, Tolson H, Cole BR. Stability of response characteristics of a Delphi panel: application of bootstrap data expansion. *BMC Medical Research Methodology* 2005; 5:37.
27. <https://www.youtube.com/watch?v=llSsgKsoAKM> (accessed 09.09.2016)
28. Glaser BG, Strauss AL. *The Discovery of Grounded Theory: strategies for qualitative research.* Chicago: Aldine. 1967.

1  
2  
3 29. The Clinical Practice Research Datalink (CPRD) opt-out system for members of the public.  
4  
5

6 <https://www.cprd.com/membersofpublic/> (accessed 09.09.2016)  
7  
8

9 30. Roberts K, Macleod J, Metcalfe C, *et al.* Hepatitis C - Assessment to Treatment Trial  
10

11 (HepCATT) in primary care: study protocol for a cluster randomised controlled trial. *Trials*  
12

13 2016; 17(1):366.  
14  
15  
16  
17  
18  
19  
20  
21  
22  
23  
24  
25  
26  
27  
28  
29  
30  
31  
32  
33  
34  
35  
36  
37  
38  
39  
40  
41  
42  
43  
44  
45  
46  
47  
48  
49  
50  
51  
52  
53  
54  
55  
56  
57  
58  
59  
60

Supplementary File 1: Table of Vignettes used in the online survey.

|                                                                                                                                                                                                                                                                                                                                                                                                                                                                                                                                                                                                                                                                                                                                                                                                                                                                                                                                                                                                                                                                                                                                                                                                                                                                                                                                                                                                                                                                                                                                                                                                                                                                                                                                                                                                                                                                                                                                                                                                                                                                                                                                 |
|---------------------------------------------------------------------------------------------------------------------------------------------------------------------------------------------------------------------------------------------------------------------------------------------------------------------------------------------------------------------------------------------------------------------------------------------------------------------------------------------------------------------------------------------------------------------------------------------------------------------------------------------------------------------------------------------------------------------------------------------------------------------------------------------------------------------------------------------------------------------------------------------------------------------------------------------------------------------------------------------------------------------------------------------------------------------------------------------------------------------------------------------------------------------------------------------------------------------------------------------------------------------------------------------------------------------------------------------------------------------------------------------------------------------------------------------------------------------------------------------------------------------------------------------------------------------------------------------------------------------------------------------------------------------------------------------------------------------------------------------------------------------------------------------------------------------------------------------------------------------------------------------------------------------------------------------------------------------------------------------------------------------------------------------------------------------------------------------------------------------------------|
| <p><b>Stigma and sensitivity</b></p>                                                                                                                                                                                                                                                                                                                                                                                                                                                                                                                                                                                                                                                                                                                                                                                                                                                                                                                                                                                                                                                                                                                                                                                                                                                                                                                                                                                                                                                                                                                                                                                                                                                                                                                                                                                                                                                                                                                                                                                                                                                                                            |
| <p><b>1)</b> A young man named John is suffering from repeated infections of oral thrush (candida in the mouth), and goes to see his GP for help. This health problem suggests to the GP that John may have an HIV infection. The GP knows if she wants to test her patient for an HIV infection she will need to explain to John why she wants to run the test and get John to consent (agree) to have the tests. This process is called <b>'fully-informed consent'</b>.<br/>HIV has a special status compared to routine blood tests, for example tests for anaemia (low iron in the blood) or diabetes (blood sugar levels). This is because a few decades ago HIV was not curable, and was associated with men who have sex with men and with injection drug users. Today we know anyone can get infected with HIV, and there are better medicines to help people with HIV still live long healthy lives. However, some people still believe there is a social stigma attached to HIV which means they think having HIV says something negative about the person who has it.<br/>The GP feels too busy and embarrassed to explain all this to John. She is not terribly familiar with HIV and does not want to offend the patient by suggesting he might have HIV. She decides not to offer John an HIV test.</p>                                                                                                                                                                                                                                                                                                                                                                                                                                                                                                                                                                                                                                                                                                                                                                                                          |
| <p><b>The use of computer selection programmes for screening</b></p>                                                                                                                                                                                                                                                                                                                                                                                                                                                                                                                                                                                                                                                                                                                                                                                                                                                                                                                                                                                                                                                                                                                                                                                                                                                                                                                                                                                                                                                                                                                                                                                                                                                                                                                                                                                                                                                                                                                                                                                                                                                            |
| <p><b>2)</b> A hospital tends to detect blood-borne virus (BBV) infections like HIV later compared to the rest of the country. This hospital is considering a BBV screening programme to help increase detection of infection. As with all hospitals, at this hospital there are patients who get routine blood tests, for example tests for anaemia if the patient is feeling tired or blood sugar levels to check for diabetes. The hospital wants to test all these routine blood samples for BBV infections.<br/>A computer programme would first select blood samples that have a high chance of being infected with a BBV. It would do this by using information such as a patient's age or post code of where they live, or results of previous tests that suggest someone may also have a BBV infection, such as abnormal liver tests. Then a laboratory worker would carry out the tests for BBV infections. If the test results are positive, then a health practitioner would tell the patient. Otherwise, patients would never know their blood had been tested unless their result was positive.<br/><b>3)</b> Computer systems in GP surgeries and hospitals currently use information on patients to select certain patients for tests or screening, based on their age and diseases they suffer from (this process of screening is in line with guidance from the National Institute of Health and Care Excellence. For example a GP surgery might select men and women over 45 years to check their cholesterol or blood pressure, and patients taking certain medications that require regular blood tests. In each of these situations the computer systems are selecting patients based on certain risk factors (e.g. age) to target those at higher risk of disease and improve the cost-effectiveness of the screening system. Current national guidelines for doctors also recommend universal testing for HIV in certain areas of the country where HIV is common. Hence the area where a patient lives is already currently being used as a criterion for whether they are screened for infection.</p> |
| <p><b>Patient consent</b></p>                                                                                                                                                                                                                                                                                                                                                                                                                                                                                                                                                                                                                                                                                                                                                                                                                                                                                                                                                                                                                                                                                                                                                                                                                                                                                                                                                                                                                                                                                                                                                                                                                                                                                                                                                                                                                                                                                                                                                                                                                                                                                                   |
| <p><b>4)</b> Some health practitioners feel too uncomfortable or busy to inform patients that their blood sample may be tested for BBV infections and get the patient's <b>fully-informed consent</b>. This belief may cause practitioners to decide not to test for BBV infections, which means some patients may not ever learn they are infected.<br/>Other ways of dealing with this issue have been suggested. For example, posters could be hung in the surgery or waiting room informing patients that their blood may be tested for BBV infections. Health practitioners could also hand out information leaflets to patients when their blood sample is being taken. It is then up to the patient to say they <b>do not</b> want to take part in the screening, or <b>'opt out'</b>, by telling the receptionist or phoning a telephone number. This type of consent, since not <b>fully-informed</b>, is described as <b>limited consent</b>. With limited consent, the patient's right to decide what happens in their health care is reduced, compared to fully-informed consent.</p>                                                                                                                                                                                                                                                                                                                                                                                                                                                                                                                                                                                                                                                                                                                                                                                                                                                                                                                                                                                                                               |



1  
2  
3  
4  
5  
6  
7  
8  
9  
10  
11  
12  
13  
14  
15  
16  
17  
18  
19  
20  
21  
22  
23  
24  
25  
26  
27  
28  
29  
30  
31  
32  
33  
34  
35  
36  
37  
38  
39  
40  
41  
42  
43  
44  
45  
46  
47  
48  
49  
50  
51  
52  
53  
54  
55  
56  
57  
58  
59  
60

5) Here we present a different approach to BBV screening and consent, described in the following story. A hospital in London has high levels of BBV infections in the local population and decides to run a new programme to help lower the levels of BBVs. Everyone aged 18-70 years old attending the A&E department who needs a routine blood test is also offered tests for the three BBVs (HIV, Hepatitis B and Hepatitis C) by the doctor or nurse treating them. Most patients agree to the tests with little discussion, and some choose to refuse the offer. However, there are still a few patients who ask further questions which means health practitioners need to provide counselling about the tests and what will happen if any tests are positive. The counselling takes additional staff time, this costs the hospital a lot more money. This form of consent is a **mix of fully-informed consent and limited (opt-out) consent**, depending on what the patients wants.

6) A Clinical Commissioning Group (CCG) covering general practices in a rural and semi-urban area decides to pilot a BBV screening programme similar to that proposed in the video you watched. In this area a lot of patients come to see their GP with symptoms too late, and already suffer with complications of BBV infections. They choose to inform all adults in the area about the screening programme by letter, including details of how to opt out of the programme if they prefer not to be screened. They also ensure that all surgeries have posters reminding patients about the programme and that health professionals taking blood samples remind patients about it and give them a leaflet detailing how they can opt out. As well as a telephone number they can call to opt out, patients can also inform the surgery receptionists who will arrange for them to opt out.

# BMJ Open

## Exploring the acceptability of a 'limited patient consent procedure' for a proposed blood-borne virus screening programme: a Delphi consensus building technique

|                                 |                                                                                                                                                                                                                                            |
|---------------------------------|--------------------------------------------------------------------------------------------------------------------------------------------------------------------------------------------------------------------------------------------|
| Journal:                        | <i>BMJ Open</i>                                                                                                                                                                                                                            |
| Manuscript ID                   | bmjopen-2016-015373.R1                                                                                                                                                                                                                     |
| Article Type:                   | Research                                                                                                                                                                                                                                   |
| Date Submitted by the Author:   | 15-Feb-2017                                                                                                                                                                                                                                |
| Complete List of Authors:       | Crane, Denise; Durham University School of Medicine Pharmacy and Health,<br>Henderson, Emily J.; Durham University School of Medicine Pharmacy and Health<br>Chadwick, David; South Tees NHS Trust, Medical Epidemiology and Biostatistics |
| <b>Primary Subject Heading</b>: | HIV/AIDS                                                                                                                                                                                                                                   |
| Secondary Subject Heading:      | Health services research, Infectious diseases, Public health, Qualitative research                                                                                                                                                         |
| Keywords:                       | Health policy < HEALTH SERVICES ADMINISTRATION & MANAGEMENT, HIV & AIDS < INFECTIOUS DISEASES, hepatitis, screening, consent, consensus building                                                                                           |
|                                 |                                                                                                                                                                                                                                            |

SCHOLARONE™  
Manuscripts

Only

1  
2  
3 **Exploring the acceptability of a 'limited patient consent procedure' for a proposed blood-borne**  
4 **virus screening programme: a Delphi consensus building technique**  
5  
6  
7  
8  
9  
10  
11  
12  
13

14 **Corresponding Author:**

15  
16  
17 Denise Crane, Centre for Public Policy and Health, School of Medicine Pharmacy and Health, Durham  
18 University, Queens Campus, Stockton on Tees, TS17 6BH, United Kingdom.  
19

20  
21  
22 Email: [denise.crane@durham.ac.uk](mailto:denise.crane@durham.ac.uk) Tel: 01278 723712.  
23  
24

25 **Co Authors:**

26  
27  
28 Emily J Henderson, Centre for Public Policy and Health, School of Medicine Pharmacy and Health,  
29 Durham University, Queens Campus, Stockton on Tees, TS17 6BH, United Kingdom.  
30  
31

32  
33 David R Chadwick, Centre for Clinical Infection, The James Cook University Hospital, Middleborough,  
34 TS4 3BW, United Kingdom.  
35  
36  
37  
38  
39  
40  
41  
42  
43  
44  
45  
46  
47  
48  
49  
50  
51  
52

53 Word count: 3765  
54  
55  
56  
57  
58  
59  
60

**ABSTRACT**

**Objective:** To identify components of a proposed population blood-borne virus (BBV) screening programme and its associated consent procedure that both the public and health practitioners (HPs) would find acceptable. The proposed BBV screening system would aim to reduce late diagnosis of BBVs and be used in patients undergoing routine blood tests, aided by risk stratification software to target individuals at higher risk of infection.

**Design:** A Delphi technique was used to build consensus amongst two separate groups, public participants and HPs in England.

**Methods:** A survey incorporating vignettes was developed, with input from an external panel of experts. Over 3 rounds, 46 public participants and 37 HPs completed the survey, rating statements on a 4 point Likert scale. The survey covered issues around stigma and sensitivity, the use of risk stratification algorithms, and 'limited' patient consent (i.e. pre-informed of the option to 'opt-out'). Consensus was defined as >70% of participants agreeing or disagreeing with each statement.

**Results:** Consensus was achieved amongst both groups in terms of acceptability of the screening programme. There was also consensus on using patient data to risk-stratify screening algorithms, and the need to obtain some form of consent around the time of drawing blood.

**Conclusions:** This study found that the special protected status of HIV in England is not only no longer deemed necessary today but hinders appropriate care. We propose that a novel 'limited consent procedure' could be implemented in future screening programmes.

**ARTICLE SUMMARY****Strengths**

- A broad range of healthcare workers and members of the public were sampled in this nationally representative study.
- Use of a Delphi consensus building technique allowed an iterative approach to achieve consensus in an area of public health with considerable potential for ethical debate.
- The study's methodology may be of interest to other countries considering such a screening programme.

**Limitations**

- The application of this study's results are limited to the UK, which has a different medicolegal framework in relation to consent, testing and screening compared to other countries.
- Whilst we attempted to send invitations to a broad range of specialists and professionals for the HP survey, the study topic might still have attracted more of those with strong views.

**KEYWORDS**

HIV, hepatitis B, hepatitis C, screening, testing, consensus building, consent

## INTRODUCTION

Globally around 47% of people living with HIV (PLWH) in 2014 were not aware they were infected [1]. The UNAID '90-90-90' target [1], with the ambition that 90% of PLWH will know their HIV status by 2020, is unlikely to be achieved, especially in some countries with relatively low economic development. The situation for the other two main blood-borne viruses (BBV), hepatitis B (HBV) and hepatitis C (HCV), is worse in terms of levels of undiagnosed infections [2-7]. Failure of timely diagnoses of HIV or other BBVs leads to continued transmission of infections as well as worse clinical outcomes. Late diagnosis of HIV is associated with a 10-fold higher risk of death in the year after diagnosis than early diagnosis [8]. Late diagnosis of HBV or HCV is also associated with higher mortality, due to liver cirrhosis, liver failure and liver cancer. Most HCV infections can now be cured, and both HBV and HIV infections controlled with antiviral therapy, if detected sufficiently early with a good prognosis for most patients.

In many highly economically developed countries reliable tests to diagnose BBVs have been widely available since the 1980s and early 1990s. In the case of HIV, testing has been viewed differently to tests for other infections or serious medical conditions; often it requires specific consent from individuals for the test, a process termed 'HIV exceptionalism' [9]. This stemmed historically from when HIV was an untreatable disease [10] and carried much social stigma, as HIV was widely associated with men who have sex with men (MSM) or intravenous drug users [11]. Despite improvements in health outcomes, knowledge that HIV can infect any demographic group and attitudes towards MSM, such stigma still remains, both amongst health practitioners and the public. As a result, attempts to screen for HIV infections more widely, which rely on health practitioners to identify patients potentially at risk, have been hindered. Moreover, the necessity of obtaining specific consent for HIV testing has remained an additional barrier to wider or universal screening. Despite this barrier, HIV testing has become more normalised over the last decade. With the introduction of 'opt-out' HIV testing [9, 12], self-testing kits and the recommendations for universal

1  
2  
3 testing in some clinical settings, particularly in pregnant women and patients attending sexually  
4 transmitted infection (STI) clinics [10]. Testing coverage in other clinical settings has been less good.  
5  
6

7  
8 Studies in the UK have shown, in patients presenting with advanced HIV infection, that high  
9 proportions attended primary care or other healthcare facilities with indicator conditions in the 1-2  
10 years prior to diagnosis, but were not tested [13-16]. Recognised barriers to more widespread HIV  
11 testing by healthcare workers include failure to identify risk factors, lack of training or knowledge,  
12 and concerns that a patient may be offended if a test is recommended [11, 17]. Efforts to increase  
13 HIV testing in clinical settings, such as Emergency Departments, have been partially effective,  
14 however, required significant additional resources and are difficult to maintain [13-15]. Even when  
15 programmes have been implemented to establish routine HIV or BBV testing in Emergency Rooms,  
16 most programmes have not managed to increase the proportion of patients tested to above 50%  
17 [13-16].  
18  
19

20  
21 New approaches to increase HIV and BBV testing and reduce rates of undiagnosed infections and  
22 late diagnosis are needed. Moreover, approaches to testing which do not require specific consent  
23 for HIV tests are likely to simplify screening and increase testing rates. In many highly economically  
24 developed countries, for example the UK, around half of the population have a blood test of some  
25 form every year, providing a potential opportunity for BBV testing via a population screening  
26 strategy [18]. Such a process might be used for universal screening, or to target only patients  
27 identified as being at higher risk of BBV infection, through risk stratification, in order to make testing  
28 cost-effective. Risk stratification would most effectively be performed by algorithms in computer  
29 physician order entry (CPOE) systems which might also interact with electronic patients records  
30 (EPR) or other computer health systems. Such software algorithms might identify those at higher risk  
31 on the basis of patient demographic characteristics, specific data or diagnostic codes in EPRs,  
32 previous abnormal test results (e.g. lymphopenia or raised ALT) or from specific tests being ordered  
33 on CPOEs (e.g. syphilis serology). However, gaining specific consent for BBV screening from  
34  
35  
36  
37  
38  
39  
40  
41  
42  
43  
44  
45  
46  
47  
48  
49  
50  
51  
52  
53  
54  
55  
56  
57  
58  
59  
60

1  
2  
3 individuals at the point of drawing blood in such a system would be challenging. Even when using  
4  
5 the 'opt-out' approach, many physicians would find the requirement to obtain specific consent from  
6  
7 all patients who might be selected for screening onerous, given the time needed to counsel some  
8  
9 patients. One alternative would be to gain limited consent, whereby patients are notified in advance  
10  
11 via written communication that their blood samples may be tested for BBVs, and also given the  
12  
13 opportunity to 'opt-out' of the screening programme. In this case, patients would not be asked to  
14  
15 consent specifically for HIV/BBV testing by the healthcare practitioner directly. Such a method of  
16  
17 gaining limited consent might be viewed as both practical and reasonable, particularly given that the  
18  
19 benefit of identifying people with undiagnosed BBV infections applies not only to their individual  
20  
21 health, but also to society via reducing BBV transmission. However, it has yet to be determined  
22  
23 whether this approach of limited consent would be considered acceptable. The aim of this study was  
24  
25 to identify components of a BBV population screening programme and associated consent  
26  
27 procedure that both the public and health practitioners would find acceptable.  
28  
29  
30

## 31 **METHODS**

### 32 **Study Design**

33  
34  
35 The study was designed using a Delphi method, a consensus-building technique that has been used  
36  
37 widely in various areas of medical practice to achieve consensus amongst HPs and patients, on  
38  
39 acceptable and effective medical practice and health service provisions [19, 20]. An online survey  
40  
41 was created utilising Bristol Online Survey ([www.onlinesurveys.ac.uk](http://www.onlinesurveys.ac.uk)) entailing 4 sections with  
42  
43 vignettes and subsequent statements encompassing our research questions. Free text comment  
44  
45 boxes at the end of each section allowed participants to provide additional comments and feedback.  
46  
47  
48  
49

### 50 **Patient Involvement**

51  
52  
53 The only patient involvement in this study is on the advisory panel who aided in the process of  
54  
55 survey development.  
56  
57  
58  
59  
60



### Participants and recruitment

Members of the public were randomly selected through a commercial survey database covering potential participants across the whole of the UK and invited by email to fill in the questionnaire. After invitations were sent out all responses were accepted sequentially until either the target number of respondents had completed the survey, or the four week time limit for the survey had been reached. After this no further participants were allowed to begin the survey. HPs were purposefully selected through relevant English National Health Service (NHS) organisations. HPs were deliberately selected from a wide range of relevant medical specialists, general practitioners and specialist nurses. Potential participants (1000 public and 400 HPs) were emailed with a description of the study and a link to the online survey and asked if they would be willing to take part. Public participants were offered a financial incentive of a £5 Amazon gift voucher after each round to improve recruitment. In Delphi exercises, 50 respondents is generally considered to be sufficient to be representative of public opinion and 30 respondents sufficient to be representative of expert opinion to enable consensus to be achieved [20-25]. A drop-out rate of 20% was expected over the 3 rounds, as this is found to be normal in other studies strengths and [25, 26]. Therefore, we sought to recruit 75 members of the public and 50 HPs to be able to achieve the target sample size at the end of 3 rounds.

### Survey development

The survey was developed by the research team with input from an external advisory panel comprising national experts in bio-ethics, medicine and Delphi methodology. Based on our review of the literature, we developed three general topic areas relevant to the proposed screening programme: stigma and sensitivity, the use of computer selection (risk stratification) algorithms/programs for BBV screening, and patient consent. To illustrate issues in each area, we wrote a number of clinical vignettes, an approach to Delphi used previously to explore ethical dilemmas [23]. The vignettes comprised short hypothetical scenarios encompassing the general

1  
2  
3 topic areas that may be experienced by the public and health practitioners (see supplementary file)  
4  
5 followed by a series of statements. Two statements were constructed for each question, in order to  
6  
7 balance negative and positive responses. Participants were asked to rate each statement using a 4-  
8  
9 point Likert scale with a response of 'strongly agree', 'agree', 'disagree' and 'strongly disagree.'  
10  
11 Statements were assessed by the advisory panel for readability and relevance.  
12

### 13 14 **Data collection**

15  
16  
17 Data were collected over three rounds; the process is summarised in Figure 1. Round 1 responses  
18  
19 were analysed, and areas requiring further investigation in Round 2 were identified. Feedback from  
20  
21 Rounds 1 and 2 was provided to the participants, with pie charts indicating group consensus and  
22  
23 disagreement as well as the respondents' original answers. Respondents were then asked to  
24  
25 reconsider the original answer in light of the group's responses.  
26  
27

28  
29 Free text comment boxes were provided at the end of each section for participants to provide any  
30  
31 further comments, and we gathered data on participants' age, gender and ethnicity. To help  
32  
33 participants understand the proposed BBV screening programme, we embedded a link in the online  
34  
35 survey to an informational YouTube video developed by DC [27].  
36  
37

### 38 39 **Data analysis**

40  
41 Following completion of the third and final round responses were analysed to establish areas of  
42  
43 consensus and areas where consensus had not been achieved. In the final analysis percentages were  
44  
45 narrowed down to agree (strongly agree and agree) and disagree (strongly disagree and disagree);  
46  
47 percentages of agree/disagree were calculated for each statement using SPSSv10. Consensus was  
48  
49 defined as >70% of participants agreeing/strongly agreeing or disagreeing/strongly disagreeing with  
50  
51 each statement; this percentage is recommended to achieve general consensus [25, 28, 29]. A  
52  
53 modified continuous comparative method of thematic analysis was used to analyse the free text  
54  
55  
56  
57  
58  
59  
60

comments in order to identify themes, allowing the determination of whether a comment made by one participant was a commonly shared or individual opinion [30].

## RESULTS

In Round 1, a total of 119 participants (68 public and 51 HP participants) were recruited; in Round 2, 51 public and 40 HPs completed the survey; in Round 3, 46 public and 37 HPs completed the survey. Within the final sample of HP respondents 55% were hospital doctors, 23% general practitioners and 12% specialist nurses; Table 1 shows the demographic data collected for the public and HP participants. Table 2 summarises consensus achieved in all three rounds, and Table 3 summarises common themes collected from all the participants free text comments.

| Socio-demographic Questions     | Public (n=46) | HP (n=37) |
|---------------------------------|---------------|-----------|
| <b>AGE</b>                      |               |           |
| Age Range (years)               | 20-73         | 29-61     |
| Mean Age (years)                | 33            | 44        |
| <b>GENDER</b>                   |               |           |
| Male                            | 21 (46%)      | 22 (59%)  |
| Female                          | 25 (54%)      | 15 (41%)  |
| <b>ETHNICITY (self-defined)</b> |               |           |
| White British                   | 33 (72%)      | 31 (84%)  |
| Asian                           | 7 (15%)       | 3 (8.5%)  |
| Indian                          | 3 (7%)        | 1 (2.5%)  |
| Chinese                         | 1 (2%)        | 1 (2.5%)  |
| American                        | 2 (4%)        | 0         |
| African                         | 0             | 1 (2.5%)  |

**Table 1. Participants' demographic data**

| STATEMENT                     | ROUND 1 |     |          |     | ROUND 2 |     |          |     | ROUND 3 |     |          |     |
|-------------------------------|---------|-----|----------|-----|---------|-----|----------|-----|---------|-----|----------|-----|
|                               | AGREE   |     | DISAGREE |     | AGREE   |     | DISAGREE |     | AGREE   |     | DISAGREE |     |
|                               | Public  | HPs | Public   | HPs | Public  | HPs | Public   | HPs | Public  | HPs | Public   | HPs |
| <b>Stigma and sensitivity</b> |         |     |          |     |         |     |          |     |         |     |          |     |

|                                                                                                                                                                                            |     |     |     |     |     |     |     |      |     |     |     |      |
|--------------------------------------------------------------------------------------------------------------------------------------------------------------------------------------------|-----|-----|-----|-----|-----|-----|-----|------|-----|-----|-----|------|
| 1. HIV tests should no longer have a special status and should be handled like any other routine blood tests                                                                               | 85% | 75% | 15% | 25% | 80% | 84% | 20% | 16%  | 80% | 88% | 20% | 12%  |
| 2. Because having HIV may make people feel they have a stigma, HIV tests should only be carried out in cases where the doctor will not offend the patient                                  | 57% | 6%  | 43% | 94% | 60% | 0%  | 40% | 100% | 60% | 2%  | 40% | 98%  |
| 3. It is acceptable for a health practitioner not to recommend that a patient has a HIV test if the health practitioner feels too uncomfortable                                            | 40% | 2%  | 60% | 98% | 41% | 0%  | 59% | 100% | 41% | 0%  | 59% | 100% |
| <b>The use of computer selection programmes for screening</b>                                                                                                                              |     |     |     |     |     |     |     |      |     |     |     |      |
| 4. The BBV screening programme is acceptable because detecting infections more often will benefit not only individual patients but also the wider community                                | 75% | 67% | 25% | 33% | 78% | 69% | 22% | 31%  | 78% | 75% | 22% | 25%  |
| 5. The BBV screening programme is not acceptable because it tests people for BBVs without their consent                                                                                    | 51% | 53% | 49% | 47% | 57% | 63% | 43% | 37%  | 57% | 70% | 43% | 30%  |
| 6. The computer programme should not be able to use information on the patient (for example age, post code or results of a previous test) to select blood samples for BBV testing          | 60% | 45% | 40% | 55% | 49% | 26% | 51% | 74%  | 49% | 22% | 51% | 78%  |
| 7. A screening programme for BBV infections would help remove the burden of having to identify and counsel patients for HIV and BBV testing                                                | 76% | 49% | 34% | 51% | 75% | 37% | 25% | 63%  | 75% | 32% | 25% | 68%  |
| 14. Assuming patients' data were fully secure, a screening programme for BBV infections should be able to use patient information to select those most at risk of infections for screening | -   | -   | -   | -   | 74% | 84% | 26% | 16%  | 72% | 98% | 28% | 2%   |

|                                                                                                                                                                                                          |     |     |     |     |     |     |     |     |            |            |     |            |
|----------------------------------------------------------------------------------------------------------------------------------------------------------------------------------------------------------|-----|-----|-----|-----|-----|-----|-----|-----|------------|------------|-----|------------|
| 15. A screening programme for BBV infections should not be allowed to use patient information to select those at most risk of infections even assuming the data was fully secure                         | -   | -   | -   | -   | 63% | 16% | 37% | 84% | 63%        | 6%         | 37% | <b>94%</b> |
| <b>Patient consent</b>                                                                                                                                                                                   |     |     |     |     |     |     |     |     |            |            |     |            |
| 8. Posters and leaflets informing patients that they may be screened for BBV infections is an acceptable way to get consent                                                                              | 70% | 53% | 30% | 47% | 57% | 42% | 43% | 58% | 57%        | 35%        | 43% | 65%        |
| 9. Using posters and leaflets is not enough. The health practitioner should still speak to patients and tell them that their blood may be tested for BBV infections and get their fully informed consent | 83% | 74% | 17% | 26% | 80% | 84% | 20% | 16% | <b>80%</b> | <b>85%</b> | 20% | 15%        |
| 10. Any loss in patient choice is outweighed by the benefit of having infections diagnosed earlier                                                                                                       | 75% | 51% | 25% | 49% | 71% | 26% | 29% | 74% | <b>71%</b> | 32%        | 29% | 68%        |
| 11. There is not adequate information for a patient to decline BBV testing for this screening programme                                                                                                  | 68% | 39% | 32% | 61% | 67% | 47% | 33% | 53% | 67%        | 42%        | 33% | 58%        |
| 12. Offering a mix of types of consent to patients getting routine blood tests is more acceptable than offering limited consent only                                                                     | 85% | 90% | 15% | 10% | 75% | 84% | 25% | 16% | <b>75%</b> | <b>90%</b> | 25% | 10%        |
| 13. Even though it may cost more money overall, offering a mix of types of consent to patients getting routine blood tests is the most acceptable way of getting consent                                 | 78% | 86% | 22% | 14% | 75% | 84% | 25% | 16% | <b>75%</b> | <b>90%</b> | 25% | 10%        |
| 16. This system of informing patients of the screening programme and permitting opt-out is sufficient for ensuring limited consent and patient awareness                                                 | -   | -   | -   | -   | 69% | 68% | 31% | 32% | 59%        | 62%        | 41% | 38%        |

|                                                                                                                                                                                                                                            |   |   |   |   |     |     |     |     |     |     |     |     |
|--------------------------------------------------------------------------------------------------------------------------------------------------------------------------------------------------------------------------------------------|---|---|---|---|-----|-----|-----|-----|-----|-----|-----|-----|
| 17. This system is not sufficient for ensuring patients are aware their blood may be tested. All patients undergoing blood tests should also be asked to agree to taking part in the screening programme by a doctor or nurse practitioner | - | - | - | - | 73% | 53% | 27% | 47% | 63% | 73% | 37% | 27% |
|--------------------------------------------------------------------------------------------------------------------------------------------------------------------------------------------------------------------------------------------|---|---|---|---|-----|-----|-----|-----|-----|-----|-----|-----|

**Table 2. Frequency of responses to the survey**

| Stigma and Sensitivity                               |                                                                                                                                                                                                                                                                                                                                                                                                                                                                               |
|------------------------------------------------------|-------------------------------------------------------------------------------------------------------------------------------------------------------------------------------------------------------------------------------------------------------------------------------------------------------------------------------------------------------------------------------------------------------------------------------------------------------------------------------|
| <b>Public</b>                                        | <p><i>"It should be carried out like any normal blood test...then the doctor couldn't be offending anyone or be embarrassed"</i></p> <p><i>"The stigma surrounding HIV would be reduced if HIV blood tests become more routine"</i></p>                                                                                                                                                                                                                                       |
| <b>HP</b>                                            | <p><i>"I feel there is a need for the position of testing to be brought in line with all other tests"</i></p> <p><i>"HIV testing would become more routine if it were offered more often"</i></p>                                                                                                                                                                                                                                                                             |
| The use of computer selection programs for screening |                                                                                                                                                                                                                                                                                                                                                                                                                                                                               |
| <b>Public</b>                                        | <p><i>"I don't feel comfortable with patients being selected based on age and post code...it's acceptable for tests to be run based on prior results"</i></p> <p><i>"I believe that implementing it would be a tremendous service if applied ethically and sensitively"</i></p> <p><i>"If data is secured and patients aware then it should be allowed"</i></p>                                                                                                               |
| <b>HP</b>                                            | <p><i>"We need universal not targeted screening"</i></p> <p><i>"If we are saying that anyone can get these infections, then surely we should check everyone"</i></p> <p><i>"Testing on the basis of age etc. will miss a large proportion of the population"</i></p>                                                                                                                                                                                                          |
| Patient consent                                      |                                                                                                                                                                                                                                                                                                                                                                                                                                                                               |
| <b>Public</b>                                        | <p><i>"While the BBV programme is in the public interest, it is vital that efforts are made to inform patients of what is happening"</i></p> <p><i>"As long as the patients are fully informed there is no problem"</i></p> <p><i>"A mixture of consent and acting in the best interests of the patient would be one of the best methods to ensure wide acceptability of the programme"</i></p>                                                                               |
| <b>HP</b>                                            | <p><i>"People are careened for many illnesses without fully informed consent, BBV should be no different"</i></p> <p><i>"Akin to random testing for diabetes, you may inform the patient that the test is happening but would not necessarily discuss all the subsequent effects and treatments"</i></p> <p><i>"I am sure that as patients become more aware of this happening to their bloods, they will be more accepting of it and ultimately see it as 'routine'"</i></p> |

**Table 3. Common themes from participants' free text comments.**

### **Stigma and sensitivity**

There was clear consensus for this section. The public and HPs agreed that HIV should no longer have a special status and should be handled like any other routine blood tests. HPs unanimously disagreed that feelings of discomfort or offending patients was an acceptable reason not to offer HIV tests.

### **The use of computer selection programs for screening:**

The public and HPs both agreed that a BBV screening programme would detect infections more often and would be beneficial to individual patients and society more widely. However, HPs contradicted themselves by also agreeing that the BBV screening programme was not acceptable as it 'tested patients without their consent.' Despite this HPs felt that computer programmes should be able to use patients' information for risk stratification. Similarly, the public agreed that the screening programme would help to remove the burden of identifying and counselling patients. Free text comments from Round 1 generally supported the concept of using patient data for risk stratification, so long as there were safeguards to ensure data were secure. In Round 2, a follow up question (statements 14 and 15) confirmed that use of patient data for these purposes would be acceptable assuming data were secure.

### **Patient consent**

Consensus was achieved in both groups on the point that it was not enough to inform patients that they may be tested for BBVs via a poster or leaflets alone. Both the public and the HPs agreed that getting fully-informed consent for BBV testing was ideal. However, the public also agreed that any loss in patient choice (i.e. autonomy) would be outweighed by having infections diagnosed earlier. For the option to offer a mix of consent options, rather than limited consent alone, the answers were irreconcilable, with the majority of both groups agreeing with the two opposing statements. However, this likely instead reflects views that reducing health care costs should not be prioritized

1  
2  
3 over obtaining sufficient consent. Free text comments in this section mostly supported the proposed  
4  
5 consent process, but emphasised the need for all patients to be informed that their blood samples  
6  
7 might be tested. Two new statements (16 and 17) were added in Round 2 to try and establish  
8  
9 consensus regarding the proposed method of consent. There was consensus amongst HPs that  
10  
11 patients should still be informed their blood might be tested for BBVs at the point of drawing blood.  
12  
13

## 14 **DISCUSSION**

15  
16  
17 This study was developed to examine attitudes of the public and HPs towards two mechanisms of  
18  
19 improving detection of HIV and BBV infections, the use of risk stratification algorithms to detect  
20  
21 patients at higher risk of infection and limited consent. We used an iterative Delphi technique with  
22  
23 the addition of new statements in subsequent rounds to clarify issues raised after responses to prior  
24  
25 statements. We found there was general agreement amongst both participant groups around  
26  
27 ending any persisting exceptionalism in relation to HIV testing. There was also consensus that a BBV  
28  
29 screening programme would be beneficial and it was reasonable to use patients' medical data to  
30  
31 target those at higher risk of infection, assuming data were protected.  
32  
33

34  
35 In respect to our investigation of a modified consent process, there was some ambiguity within both  
36  
37 groups, and thus consensus on this point was not easily discernible, indicating this form of consent  
38  
39 posed some ethical dilemma. However, through iteration of rounds and use of free text boxes, a  
40  
41 new and acceptable form of a consent process emerged from this Delphi study. We call this process  
42  
43 'limited consent' which involves providing advanced notification to all patients that their blood may  
44  
45 be tested, with a reminder from a HP when blood is drawn, along with the option of opting out. This  
46  
47 Delphi study achieved a large national English sample from a range of HPs involved in BBV testing  
48  
49 and the general public. Its finding of acceptability of a novel consent procedure, and implications for  
50  
51 the development of a new BBV screening programme, however may be applicable only to the  
52  
53 English social context.  
54  
55  
56  
57  
58  
59  
60



1  
2  
3 Given the apparent sensitivity that still exists around offering HIV testing, it is interesting that both  
4 public participants and a broad range of medical and nursing HPs were comfortable with the concept  
5 of not only reducing the exceptionalism that has traditionally been associated with HIV testing, but  
6 also with the concept of prior consent. In devising the statements in the survey, we deliberately  
7 wanted to test how far each group might consider balancing the primacy of patients' autonomy, in  
8 terms of deciding whether to be tested for BBVs, over the competing ethical principal of  
9 utilitarianism. The utilitarian argument in favour of universal or targeted screening for BBVs is that  
10 society as a whole benefits if more people are diagnosed with BBV infections since transmission is  
11 reduced, fewer individuals are infected and healthcare costs are reduced.  
12  
13  
14  
15  
16  
17  
18  
19  
20  
21  
22

23 Unlike some other screening programmes, the benefits of the proposed BBV screening programme  
24 would extend more widely than to just those individuals found to be infected with BBVs. Another  
25 significant difference is that given the frequency with which patients in general have blood tests, and  
26 potential uncertainty of which patients would be tested using risk stratification algorithms, obtaining  
27 specific and direct consent for testing each time a patient has blood drawn is impractical. Hence  
28 obtaining prior consent from the target adult population with the clear option of opting out of  
29 testing may prove both practical as well as acceptable based on our study. There is a precedent for  
30 this form of consent in the UK Clinical Practice Research Database [31], where all adults in the areas  
31 contributing medical data to this system are informed by letter that their fully-anonymised data may  
32 be used for research studies or service planning unless they decide to 'opt-out' of the system. One  
33 recent study screening for BBVs in Emergency Departments has also successfully employed a  
34 pragmatic and limited consent process [16]. The use of risk stratification software to identify  
35 patients at higher risk of BBV infections has recently been employed in the UK-based HepCATT trial,  
36 as part of targeted case finding for hepatitis C infection in primary care [32]. We believe that  
37 combining such risk stratification software to target screening with a practical and acceptable  
38 consent process has considerable potential to reduce the number of individuals with undiagnosed  
39  
40  
41  
42  
43  
44  
45  
46  
47  
48  
49  
50  
51  
52  
53  
54  
55  
56  
57  
58  
59  
60

1  
2  
3 BBVs in countries with suitable health infrastructure. Further research into its design and  
4  
5 implementation would be needed.  
6  
7

8 A recent UK study found that adding HBV/HCV tests to routine HIV tests in Emergency Departments  
9  
10 resulted in significant numbers of new diagnoses of viral hepatitis as well as HIV, with the cost per  
11  
12 new diagnosis well below the threshold for cost-effectiveness [13]. This adds weight to the concept  
13  
14 of screening specific or general populations for all three BBVs, rather than just HIV. Changing to the  
15  
16 new consent process led to testing rates increasing from below 5% of all patients to consistently  
17  
18 over 60% with mean numbers of positive results increasing from less than 1 per week to 4 per week  
19  
20 [16]. The process of obtaining consent in the present study may be viewed as a paradigm for future  
21  
22 screening programmes or studies exploring alternative approaches to increase BBV testing. Our  
23  
24 study adds to the evidence suggesting that both the public as well as HPs may be willing to accept  
25  
26 prior consent, where HPs do not need to obtain specific consent for HIV or BBV testing, given the  
27  
28 benefits of earlier diagnosis of BBV infections both to individuals as well as society in general.  
29  
30  
31

### 32 **CONCLUSION**

33  
34  
35 This study has a number of strengths and limitations. The study used a Delphi consensus technique  
36  
37 allowing an iterative approach to achieve consensus in an area of public health with considerable  
38  
39 potential for ethical debate. We successfully recruited a broad range of healthcare workers and  
40  
41 members of the public with a sample size appropriate to the methodology, thus producing a  
42  
43 nationally representative sample. However, the application of the study's findings are restricted to  
44  
45 the UK, given that other countries have different medicolegal systems in relation to consent and use  
46  
47 of data, although our methodology may be of interest to other countries considering a screening  
48  
49 programme. Another limitation is that the selection process for HP participants might have led to  
50  
51 self-selection bias. Whilst we attempted to send invitations to a broad range of specialists and  
52  
53 professionals for the HP survey, the topic might still have attracted more of those with strong views.  
54  
55  
56  
57  
58  
59  
60

1  
2  
3 However, this is a selection bias that applies to any kind of questionnaire study and is not specific  
4  
5 only to our study.  
6

7  
8 HIV related issues, such as treatment, and social stigma, have developed over the past couple of  
9  
10 decades, and associated BBV screening programmes should reflect these advances. This study found  
11  
12 that the special status of HIV testing in the UK may no longer be necessary today whilst hindering  
13  
14 appropriate screening, and proposes a novel consent procedure that could be implemented in  
15  
16 future screening programmes in the UK. Our findings could be used to inform the development of  
17  
18 public policy that would facilitate such a BBV screening programme, as well as the development of  
19  
20 professional education in terms of reducing the social stigma associated with HIV and strengthening  
21  
22 communication between clinicians and their patients.  
23  
24

#### 25 26 **ACKNOWLEDGEMENTS** 27

28  
29 We are very grateful to the doctors, nurses and public participants who responded to our survey,  
30  
31 Charlotte Jacobs our study coordinator and Robbie Horton who developed the YouTube video. We  
32  
33 are indebted to the following expert advisors who assisted with the survey development and  
34  
35 interpretation of responses: Dr Alasdair MacSween, Teesside University; Dr Elaine Kirk, GP at NHS  
36  
37 England; Professor Rebecca Bennett, Manchester University, Professor Jackie Leach Scully,  
38  
39 Newcastle University; Neil Campling and Alex Murray.  
40  
41  
42

#### 43 **COMPETING INTERESTS** 44

45  
46 No competing interests.  
47

#### 48 **FUNDING** 49

50  
51  
52 South Tees Infectious Diseases Research Fund (8072SA).  
53  
54  
55  
56  
57  
58  
59  
60

**ETHICAL APPROVAL**

This study received ethical approval from the Durham University School of Medicine, Pharmacy and Health's Sub-Ethics Committee. All data were treated according to the Data Protection Act 1998.

**DATA SHARING STATEMENT**

No additional data available.

**CONTRIBUTORSHIP STATEMENT**

Denise Crane, Emily J Henderson and David R Chadwick were all responsible for the conception and design of this study, interpretation of the data, drafting, revising and approval of the final document. Denise Crane was responsible for recruitment of the participants, collection and analysis of the data.

**COPYRIGHT**

The Corresponding Author has the right to grant on behalf of all authors and does grant on behalf of all authors, a worldwide licence to the Publishers and its licensees in perpetuity, in all forms, formats and media (whether known now or created in the future), to i) publish, reproduce, distribute, display and store the Contribution, ii) translate the Contribution into other languages, create adaptations, reprints, include within collections and create summaries, extracts and/or, abstracts of the Contribution, iii) create any other derivative work(s) based on the Contribution, iv) to exploit all subsidiary rights in the Contribution, v) the inclusion of electronic links from the Contribution to third party material where-ever it may be located; and, vi) licence any third party to do any or all of the above.

**TRANSPARENCY DECLARATION**

The lead author affirms that the manuscript is an honest, accurate, and transparent account of the study being reported; that no important aspects of the study have been omitted; and that any discrepancies from the study as planned (and, if relevant, registered) have been explained.

## REFERENCES

1. Joint United Nation Programme on HIV/AIDS (UNAIDS). 90-90-90 UNAIDS - An Ambitious Treatment Target To Help End The AIDS Epidemic. UNAIDS; 2014.  
[http://www.unaids.org/sites/default/files/media\\_asset/90-90-90\\_en\\_0.pdf](http://www.unaids.org/sites/default/files/media_asset/90-90-90_en_0.pdf) (accessed 09.09.2016)
2. Moorman AC, Xing J, Ko S, *et al.* Late Diagnosis of Hepatitis C Virus Infection in the Chronic Hepatitis Cohort Study (CHeCS): Missed Opportunities for Intervention. *Hepatology* 2015; 61(5):1479-1484.
3. Niederau, C. Chronic hepatitis B in 2014: Great therapeutic progress, large diagnostic deficit. *World Journal of Gastroenterology* 2014; 20(33):11595-11617.
4. Cornberg M, Razavi HA, Alberti A, *et al.* A systematic review of hepatitis C virus epidemiology in Europe, Canada and Israel. *Liver International* 2011; 31(Suppl 2):30-60.
5. Health Protection Agency. Hepatitis C in the United Kingdom: 2013 Report. London: Health Protection Services; 2013.
6. Public Health England. Hepatitis C in the UK: 2013 report. London: Public Health England; 2013.  
[https://www.gov.uk/government/uploads/system/uploads/attachment\\_data/file/364074/Hepatitis\\_C\\_in\\_the\\_UK\\_2013.pdf](https://www.gov.uk/government/uploads/system/uploads/attachment_data/file/364074/Hepatitis_C_in_the_UK_2013.pdf) (accessed 09.09.2016)
7. O'Leary MC, Sarwar M, Hutchinson SJ, *et al.* The prevalence of hepatitis C virus among people of South Asian origin in Glasgow – Results from a community based survey and laboratory surveillance. *Travel Medicine and Infectious Disease* 2013; 11(5):301-309.

- 1  
2  
3 8. McPherson S, Valappil M, Moses SE, *et al.* Targeted case finding for hepatitis B using dry  
4  
5 blood spot testing in the British-Chinese and South Asian populations of the North-East of  
6  
7 England. *Journal of Viral Hepatitis* 2013; 20(9):638-644.  
8  
9
- 10 9. Stein N. Ethics in consent for HIV testing. *The virtual mentor VM* 2009; 11(12):959-961.  
11  
12
- 13 10. Bayer R, Fairchild AL. Changing the paradigm for HIV testing – The end of exceptionalism.  
14  
15 *New England Journal of Medicine* 2006; 355(7):647-649.  
16  
17
- 18 11. General Medical Council (GMC). Confidentiality: Protecting and Providing Information  
19  
20 (2000). GMC-UK-org 2004.  
21  
22 [http://www.gmc-uk.org/confidentiality\\_sep\\_2000.pdf\\_25416426.pdf](http://www.gmc-uk.org/confidentiality_sep_2000.pdf_25416426.pdf) (accessed 09.09.2016)  
23  
24
- 25 12. General Medical Council (GMC). Consent: patients and doctors making decisions together.  
26  
27 GMC-UK.org 2008.  
28  
29 [http://www.gmc-uk.org/static/documents/content/Consent\\_-\\_English\\_1015.pdf](http://www.gmc-uk.org/static/documents/content/Consent_-_English_1015.pdf) (accessed  
30  
31  
32 09.09.2016)  
33  
34
- 35 13. Orkin C, Flanagan S, Wallis E, *et al.* Incorporating HIV/hepatitis B virus/hepatitis C virus  
36  
37 combined testing into routine blood tests in nine UK Emergency Departments: the “Going  
38  
39 Viral” campaign. *HIV Medicine* 2016; 17(3):222-230.  
40  
41  
42
- 43 14. Elmahdi R, Gerver SM, Guillen GG, *et al.* Low levels of HIV test coverage in clinical settings in  
44  
45 the UK: a systematic review of adherence to 2008 guidelines. *Sexually Transmitted Infections*  
46  
47 2014; 90(2):119-124.  
48  
49
- 50 15. Hartney T, Kennedy I, Crooke P, *et al.* Expanded HIV testing in high prevalence areas in  
51  
52 England: results of a 2012 audit of sexual health commissioners. *HIV Medicine* 2014;  
53  
54 15(4):251-254.  
55  
56  
57  
58  
59  
60

- 1  
2  
3 16. Paparello J, Hunter L, Betournay R, *et al.* Reducing the barriers to HIV testing – a simplified  
4 consent pathway increases the uptake of HIV testing in a high prevalence population. *HIV*  
5 *Medicine* 2016; 17(Suppl 1):9.  
6  
7  
8  
9  
10 17. British HIV Association (BHIVA), British Association of Sexual Health and HIV (BASHH), British  
11 Infection Society (BIS). UK National Guideline for HIV testing 2008. BHIVA.org 2008.  
12 <http://www.bhiva.org/documents/Guidelines/Testing/GlinesHIVTest08.pdf> (accessed  
13 09.09.2016)  
14  
15  
16  
17  
18  
19  
20 18. <http://www.nhs.uk/conditions/Blood-tests/Pages/Introduction.aspx> (accessed 09.09.2016)  
21  
22  
23  
24 19. Jones J, Hunter D. Consensus methods for medical and health services research. *The British*  
25 *Medical Journal* 1995; 311:376-380.  
26  
27  
28 20. [http://www.journalslibrary.nihr.ac.uk/\\_data/assets/pdf\\_file/0003/64839/FullReport-](http://www.journalslibrary.nihr.ac.uk/_data/assets/pdf_file/0003/64839/FullReport-hta2030.pdf)  
29 [hta2030.pdf](http://www.journalslibrary.nihr.ac.uk/_data/assets/pdf_file/0003/64839/FullReport-hta2030.pdf) (accessed 09.09.2016)  
30  
31  
32 21. Cook S, Aikens JE, Berry CA, *et al.* Development of the Diabetes Problem-Solving Measure for  
33 Adolescents. *Diabetes Educator* 2001; 27(6):865-874.  
34  
35  
36  
37 22. Rose CM, Kagan AR. The final report of the expert panel for the Radiation Oncology Bone  
38 Metastasis Work Group of the American College of Radiology. *International Journal of*  
39 *Radiation Oncology Biology Physics* 1998; 40(5):1117-1124.  
40  
41  
42  
43 23. Wainwright P, Gallagher A, Tompsett H, *et al.* The use of vignettes within a Delphi exercise: a  
44 useful approach in empirical ethics? *Journal of Medical Ethics* 2010; 36(11):656-660.  
45  
46  
47  
48 24. Wigton RS, Darr CA, Corbett KK, *et al.* How do community practitioners decide whether to  
49 prescribe antibiotics for acute respiratory tract infections? *Journal of General Internal*  
50 *Medicine* 2008; 23(10):1615-1620.  
51  
52  
53  
54  
55  
56  
57  
58  
59  
60

- 1  
2  
3 25. Henderson EJ, Rubin GP. Development of a community based model for respiratory care  
4  
5 services. *BMC Health Services Research* 2012; 12:193.  
6  
7  
8 26. Akins RB, Tolson H, Cole BR. Stability of response characteristics of a Delphi panel:  
9  
10 application of bootstrap data expansion. *BMC Medical Research Methodology* 2005; 5:37.  
11  
12  
13 27. <https://www.youtube.com/watch?v=llSsgKsoAKM> (accessed 09.09.2016)  
14  
15  
16 28. Diamond IR, Grant RC, Feldman BM, *et al.* Defining consensus: a systematic review  
17  
18 recommends methodological criteria for reporting Delphi studies. *Journal of Epidemiology.*  
19  
20 2014; 67:401-409.  
21  
22  
23 29. Slade SC, Dionne CE, Underwood M, *et al.* Standardised method for reporting exercise  
24  
25 programmes: protocol for a modified Delphi study. *BMJ Open.* 2014; 4:e006682.  
26  
27  
28 30. Glaser BG, Strauss AL. *The Discovery of Grounded Theory: strategies for qualitative research.*  
29  
30 Chicago: Aldine. 1967.  
31  
32  
33 31. The Clinical Practice Research Datalink (CPRD) opt-out system for members of the public.  
34  
35  
36 <https://www.cprd.com/membersofpublic/> (accessed 09.09.2016)  
37  
38  
39  
40 32. Roberts K, Macleod J, Metcalfe C, *et al.* Hepatitis C - Assessment to Treatment Trial  
41  
42 (HepCATT) in primary care: study protocol for a cluster randomised controlled trial. *Trials*  
43  
44 2016; 17(1):366.  
45  
46  
47  
48  
49  
50  
51  
52  
53  
54  
55  
56  
57  
58  
59  
60



1  
2  
3  
4  
5  
6  
7  
8  
9  
10  
11  
12  
13  
14  
15  
16  
17  
18  
19  
20  
21  
22  
23  
24  
25  
26  
27  
28  
29  
30  
31  
32  
33  
34  
35  
36  
37  
38  
39  
40  
41  
42  
43  
44  
45  
46  
47  
48  
49  
50  
51  
52  
53  
54  
55  
56  
57  
58  
59  
60

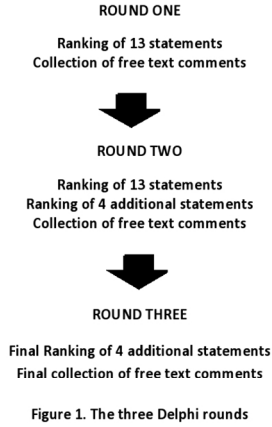

Figure 1. The three Delphi rounds

437x618mm (72 x 72 DPI)

Supplementary File 1: Table of Vignettes used in the online survey.

|                                                                                                                                                                                                                                                                                                                                                                                                                                                                                                                                                                                                                                                                                                                                                                                                                                                                                                                                                                                                                                                                                                                                                                                                                                                                                                                                                                                                                                                                                                                                                                                                                                                                                                                                                                                                                                                                                                                                                                                                                                                                                                                                    |
|------------------------------------------------------------------------------------------------------------------------------------------------------------------------------------------------------------------------------------------------------------------------------------------------------------------------------------------------------------------------------------------------------------------------------------------------------------------------------------------------------------------------------------------------------------------------------------------------------------------------------------------------------------------------------------------------------------------------------------------------------------------------------------------------------------------------------------------------------------------------------------------------------------------------------------------------------------------------------------------------------------------------------------------------------------------------------------------------------------------------------------------------------------------------------------------------------------------------------------------------------------------------------------------------------------------------------------------------------------------------------------------------------------------------------------------------------------------------------------------------------------------------------------------------------------------------------------------------------------------------------------------------------------------------------------------------------------------------------------------------------------------------------------------------------------------------------------------------------------------------------------------------------------------------------------------------------------------------------------------------------------------------------------------------------------------------------------------------------------------------------------|
| <p><b>Stigma and sensitivity</b></p>                                                                                                                                                                                                                                                                                                                                                                                                                                                                                                                                                                                                                                                                                                                                                                                                                                                                                                                                                                                                                                                                                                                                                                                                                                                                                                                                                                                                                                                                                                                                                                                                                                                                                                                                                                                                                                                                                                                                                                                                                                                                                               |
| <p><b>1)</b> A young man named John is suffering from repeated infections of oral thrush (candida in the mouth), and goes to see his GP for help. This health problem suggests to the GP that John may have an HIV infection. The GP knows if she wants to test her patient for an HIV infection she will need to explain to John why she wants to run the test and get John to consent (agree) to have the tests. This process is called <b>'fully-informed consent'</b>.<br/>HIV has a special status compared to routine blood tests, for example tests for anaemia (low iron in the blood) or diabetes (blood sugar levels). This is because a few decades ago HIV was not curable, and was associated with men who have sex with men and with injection drug users. Today we know anyone can get infected with HIV, and there are better medicines to help people with HIV still live long healthy lives. However, some people still believe there is a social stigma attached to HIV which means they think having HIV says something negative about the person who has it.<br/>The GP feels too busy and embarrassed to explain all this to John. She is not terribly familiar with HIV and does not want to offend the patient by suggesting he might have HIV. She decides not to offer John an HIV test.</p>                                                                                                                                                                                                                                                                                                                                                                                                                                                                                                                                                                                                                                                                                                                                                                                                             |
| <p><b>The use of computer selection programmes for screening</b></p>                                                                                                                                                                                                                                                                                                                                                                                                                                                                                                                                                                                                                                                                                                                                                                                                                                                                                                                                                                                                                                                                                                                                                                                                                                                                                                                                                                                                                                                                                                                                                                                                                                                                                                                                                                                                                                                                                                                                                                                                                                                               |
| <p><b>2)</b> A hospital tends to detect blood-borne virus (BBV) infections like HIV later compared to the rest of the country. This hospital is considering a BBV screening programme to help increase detection of infection. As with all hospitals, at this hospital there are patients who get routine blood tests, for example tests for anaemia if the patient is feeling tired or blood sugar levels to check for diabetes. The hospital wants to test all these routine blood samples for BBV infections.<br/>A computer programme would first select blood samples that have a high chance of being infected with a BBV. It would do this by using information such as a patient's age or post code of where they live, or results of previous tests that suggest someone may also have a BBV infection, such as abnormal liver tests. Then a laboratory worker would carry out the tests for BBV infections. If the test results are positive, then a health practitioner would tell the patient. Otherwise, patients would never know their blood had been tested unless their result was positive.</p> <p><b>3)</b> Computer systems in GP surgeries and hospitals currently use information on patients to select certain patients for tests or screening, based on their age and diseases they suffer from (this process of screening is in line with guidance from the National Institute of Health and Care Excellence. For example a GP surgery might select men and women over 45 years to check their cholesterol or blood pressure, and patients taking certain medications that require regular blood tests. In each of these situations the computer systems are selecting patients based on certain risk factors (e.g. age) to target those at higher risk of disease and improve the cost-effectiveness of the screening system. Current national guidelines for doctors also recommend universal testing for HIV in certain areas of the country where HIV is common. Hence the area where a patient lives is already currently being used as a criterion for whether they are screened for infection.</p> |
| <p><b>Patient consent</b></p>                                                                                                                                                                                                                                                                                                                                                                                                                                                                                                                                                                                                                                                                                                                                                                                                                                                                                                                                                                                                                                                                                                                                                                                                                                                                                                                                                                                                                                                                                                                                                                                                                                                                                                                                                                                                                                                                                                                                                                                                                                                                                                      |
| <p><b>4)</b> Some health practitioners feel too uncomfortable or busy to inform patients that their blood sample may be tested for BBV infections and get the patient's <b>fully-informed consent</b>. This belief may cause practitioners to decide not to test for BBV infections, which means some patients may not ever learn they are infected.<br/>Other ways of dealing with this issue have been suggested. For example, posters could be hung in the surgery or waiting room informing patients that their blood may be tested for BBV infections. Health practitioners could also hand out information leaflets to patients when their blood sample is being taken. It is then up to the patient to say they <b>do not</b> want to take part in the screening, or <b>'opt out'</b>, by telling the receptionist or phoning a telephone number. This type of consent, since not <b>fully-informed</b>, is described as <b>limited consent</b>. With limited consent, the patient's right to decide what happens in their health care is reduced, compared to fully-informed consent.</p>                                                                                                                                                                                                                                                                                                                                                                                                                                                                                                                                                                                                                                                                                                                                                                                                                                                                                                                                                                                                                                  |

1  
2  
3  
4  
5) Here we present a different approach to BBV screening and consent, described in the following story. A hospital in London has high levels of BBV infections in the local population and decides to run a new programme to help lower the levels of BBVs. Everyone aged 18-70 years old attending the A&E department who needs a routine blood test is also offered tests for the three BBVs (HIV, Hepatitis B and Hepatitis C) by the doctor or nurse treating them. Most patients agree to the tests with little discussion, and some choose to refuse the offer. However, there are still a few patients who ask further questions which means health practitioners need to provide counselling about the tests and what will happen if any tests are positive. The counselling takes additional staff time, this costs the hospital a lot more money. This form of consent is a **mix of fully-informed consent and limited (opt-out) consent**, depending on what the patients wants.

6) A Clinical Commissioning Group (CCG) covering general practices in a rural and semi-urban area decides to pilot a BBV screening programme similar to that proposed in the video you watched. In this area a lot of patients come to see their GP with symptoms too late, and already suffer with complications of BBV infections. They choose to inform all adults in the area about the screening programme by letter, including details of how to opt out of the programme if they prefer not to be screened. They also ensure that all surgeries have posters reminding patients about the programme and that health professionals taking blood samples remind patients about it and give them a leaflet detailing how they can opt out. As well as a telephone number they can call to opt out, patients can also inform the surgery receptionists who will arrange for them to opt out.

# BMJ Open

## Exploring the acceptability of a 'limited patient consent procedure' for a proposed blood-borne virus screening programme: a Delphi consensus building technique

|                                 |                                                                                                                                                                                                                                            |
|---------------------------------|--------------------------------------------------------------------------------------------------------------------------------------------------------------------------------------------------------------------------------------------|
| Journal:                        | <i>BMJ Open</i>                                                                                                                                                                                                                            |
| Manuscript ID                   | bmjopen-2016-015373.R2                                                                                                                                                                                                                     |
| Article Type:                   | Research                                                                                                                                                                                                                                   |
| Date Submitted by the Author:   | 17-Mar-2017                                                                                                                                                                                                                                |
| Complete List of Authors:       | Crane, Denise; Durham University School of Medicine Pharmacy and Health,<br>Henderson, Emily J.; Durham University School of Medicine Pharmacy and Health<br>Chadwick, David; South Tees NHS Trust, Medical Epidemiology and Biostatistics |
| <b>Primary Subject Heading</b>: | HIV/AIDS                                                                                                                                                                                                                                   |
| Secondary Subject Heading:      | Health services research, Infectious diseases, Public health, Qualitative research                                                                                                                                                         |
| Keywords:                       | Health policy < HEALTH SERVICES ADMINISTRATION & MANAGEMENT, HIV & AIDS < INFECTIOUS DISEASES, hepatitis, screening, consent, consensus building                                                                                           |
|                                 |                                                                                                                                                                                                                                            |

SCHOLARONE™  
Manuscripts

Only

1  
2  
3 **Exploring the acceptability of a 'limited patient consent procedure' for a proposed blood-borne**  
4 **virus screening programme: a Delphi consensus building technique**  
5  
6  
7  
8  
9  
10  
11  
12  
13

14 **Corresponding Author:**

15  
16  
17 Denise Crane, Centre for Public Policy and Health, School of Medicine Pharmacy and Health, Durham  
18 University, Queens Campus, Stockton on Tees, TS17 6BH, United Kingdom.  
19

20  
21  
22 Email: [denise.crane@durham.ac.uk](mailto:denise.crane@durham.ac.uk) Tel: 01278 723712.  
23  
24

25 **Co Authors:**

26  
27  
28 Emily J Henderson, Centre for Public Policy and Health, School of Medicine Pharmacy and Health,  
29 Durham University, Queens Campus, Stockton on Tees, TS17 6BH, United Kingdom.  
30  
31

32  
33 David R Chadwick, Centre for Clinical Infection, The James Cook University Hospital, Middleborough,  
34 TS4 3BW, United Kingdom.  
35  
36  
37  
38  
39  
40  
41  
42  
43  
44  
45  
46  
47  
48  
49  
50  
51  
52

53 Word count: 3895  
54  
55  
56  
57  
58  
59  
60

**ABSTRACT**

**Objective:** To identify components of a proposed population blood-borne virus (BBV) screening programme and its associated consent procedure that both the public and health practitioners (HPs) would find acceptable. The proposed BBV screening system would aim to reduce late diagnosis of BBVs and be used in patients undergoing routine blood tests, aided by risk stratification software to target individuals at higher risk of infection.

**Design:** A Delphi technique was used to build consensus amongst two separate groups, public participants and HPs in England.

**Methods:** A survey incorporating vignettes was developed, with input from an external panel of experts. Over 3 rounds, 46 public participants and 37 HPs completed the survey, rating statements on a 4 point Likert scale. The survey covered issues around stigma and sensitivity, the use of risk stratification algorithms, and 'limited' patient consent (i.e. pre-informed of the option to 'opt-out'). Consensus was defined as >70% of participants agreeing or disagreeing with each statement.

**Results:** Consensus was achieved amongst both groups in terms of acceptability of the screening programme. There was also consensus on using patient data to risk-stratify screening algorithms, and the need to obtain some form of consent around the time of drawing blood.

**Conclusions:** This study found that the special protected status of HIV in England is no longer deemed necessary today and hinders appropriate care. We propose that a novel 'limited consent procedure' could be implemented in future screening programmes.

**ARTICLE SUMMARY****Strengths**

- A broad range of healthcare workers and members of the public were sampled in this nationally representative study.
- Use of a Delphi consensus building technique allowed an iterative approach to achieve consensus in an area of public health with considerable potential for ethical debate.
- The study's methodology may be of interest to other countries considering such a screening programme.

**Limitations**

- The application of this study's results are limited to the UK, which has a different medicolegal framework in relation to consent, testing and screening compared to other countries.
- Whilst we attempted to send invitations to a broad range of specialists and professionals for the HP survey, the study topic might still have attracted more of those with strong views.

**KEYWORDS**

HIV, hepatitis B, hepatitis C, screening, testing, consensus building, consent

## INTRODUCTION

Globally around 47% of people living with HIV (PLWH) in 2014 were not aware they were infected [1]. The UNAID '90-90-90' target [1], with the ambition that 90% of PLWH will know their HIV status by 2020, is unlikely to be achieved, especially in some countries with relatively low economic development. The situation for the other two main blood-borne viruses (BBV), hepatitis B (HBV) and hepatitis C (HCV), is worse in terms of levels of undiagnosed infections [2-7]. Failure of timely diagnoses of HIV or other BBVs leads to continued transmission of infections as well as worse clinical outcomes. Late diagnosis of HIV is associated with a 10-fold higher risk of death in the year after diagnosis than early diagnosis [8]. Late diagnosis of HBV or HCV is also associated with higher mortality, due to liver cirrhosis, liver failure and liver cancer. Most HCV infections can now be cured, and both HBV and HIV infections controlled with antiviral therapy, if detected sufficiently early with a good prognosis for most patients.

In many highly economically developed countries reliable tests to diagnose BBVs have been widely available since the 1980s and early 1990s. In the case of HIV, testing has been viewed differently to tests for other infections or serious medical conditions; often it requires specific consent from individuals for the test, a process termed 'HIV exceptionalism' [9]. This stemmed historically from when HIV was an untreatable disease [10] and carried much social stigma, as HIV was widely associated with men who have sex with men (MSM) or intravenous drug users [11]. Despite improvements in health outcomes, knowledge that HIV can infect any demographic group and attitudes towards MSM, such stigma still remains, both amongst health practitioners and the public. As a result, attempts to screen for HIV infections more widely, which rely on health practitioners to identify patients potentially at risk, have been hindered. Moreover, the necessity of obtaining specific consent for HIV testing has remained an additional barrier to wider or universal screening. Despite this barrier, HIV testing has become more normalised over the last decade. With the introduction of 'opt-out' HIV testing [9, 12], self-testing kits and the recommendations for universal



1  
2  
3 testing in some clinical settings, particularly in pregnant women and patients attending sexually  
4 transmitted infection (STI) clinics [10]. Testing coverage in other clinical settings has been less good.  
5  
6

7  
8 Studies in the UK have shown there has been missed opportunities for earlier diagnosis; high  
9 proportions of patients with advanced HIV infection attended primary care or other healthcare  
10 facilities with indicator conditions in the 1-2 years prior to diagnosis, but were not tested [13-16].  
11  
12

13  
14 Recognised barriers to more widespread HIV testing by healthcare workers include failure to identify  
15 risk factors, lack of training or knowledge, and concerns that a patient may be offended if a test is  
16 recommended [11, 17]. Efforts to increase HIV testing in clinical settings, such as Emergency  
17 Departments, have been partially effective, however, required significant additional resources and  
18 are difficult to maintain [13-15]. Even when programmes have been implemented to establish  
19 routine HIV or BBV testing in Emergency Rooms, most programmes have not managed to increase  
20 the proportion of patients tested to above 50% [13-16].  
21  
22  
23  
24  
25  
26  
27  
28

29  
30 New approaches to increase HIV and BBV testing and reduce rates of undiagnosed infections and  
31 late diagnosis are needed. Moreover, approaches to testing which do not require specific consent  
32 for HIV tests are likely to simplify screening and increase testing rates. In many highly economically  
33 developed countries, for example the UK, around half of the population have a blood test of some  
34 form every year, providing a potential opportunity for BBV testing via a population screening  
35 strategy [18]. Such a process might be used for universal screening, or to target only patients  
36 identified as being at higher risk of BBV infection, through risk stratification, in order to make testing  
37 cost-effective. Risk stratification would most effectively be performed by algorithms in computer  
38 physician order entry (CPOE) systems which might also interact with electronic patients records  
39 (EPR) or other computer health systems. Such software algorithms might identify those at higher risk  
40 on the basis of patient demographic characteristics, specific data or diagnostic codes in EPRs,  
41 previous abnormal test results (e.g. lymphopenia or raised ALT) or from specific tests being ordered  
42 on CPOEs (e.g. syphilis serology). However, gaining specific consent for BBV screening from  
43  
44  
45  
46  
47  
48  
49  
50  
51  
52  
53  
54  
55  
56  
57  
58  
59  
60

1  
2  
3 individuals at the point of drawing blood in such a system would be challenging. Even when using  
4  
5 the 'opt-out' approach, many physicians would find the requirement to obtain specific consent from  
6  
7 all patients who might be selected for screening onerous, given the time needed to counsel some  
8  
9 patients. One alternative would be to gain limited consent, whereby patients are notified in advance  
10  
11 via written communication that their blood samples may be tested for BBVs, and also given the  
12  
13 opportunity to 'opt-out' of the screening programme. In this case, patients would not be asked to  
14  
15 consent specifically for HIV/BBV testing by the healthcare practitioner directly. Such a method of  
16  
17 gaining limited consent might be viewed as both practical and reasonable, particularly given that the  
18  
19 benefit of identifying people with undiagnosed BBV infections applies not only to their individual  
20  
21 health, but also to society via reducing BBV transmission. However, it has yet to be determined  
22  
23 whether this approach of limited consent would be considered acceptable. The aim of this study was  
24  
25 to identify components of a BBV population screening programme and associated consent  
26  
27 procedure that both the public and health practitioners would find acceptable.  
28  
29

## 30 31 32 **METHODS**

### 33 34 35 **Study Design**

36  
37 The study was designed using a Delphi method, a consensus-building technique that has been used  
38  
39 widely in various areas of medical practice to achieve consensus amongst HPs and patients, on  
40  
41 acceptable and effective medical practice and health service provisions [19, 20]. An online survey  
42  
43 was created utilising Bristol Online Survey ([www.onlinesurveys.ac.uk](http://www.onlinesurveys.ac.uk)) entailing 4 sections with  
44  
45 vignettes and subsequent statements encompassing our research questions. Free text comment  
46  
47 boxes at the end of each section allowed participants to provide additional comments and feedback.  
48  
49

### 50 51 52 **Patient Involvement**

53  
54 The only patient involvement in this study is on the advisory panel who aided in the process of  
55  
56 survey development.  
57  
58  
59  
60

### Participants and recruitment

Members of the public were randomly selected through a commercial survey database covering potential participants across the whole of the UK and invited by email to fill in the questionnaire. After invitations were sent out all responses were accepted sequentially until either the target number of respondents had completed the survey, or the four week time limit for the survey had been reached. After this no further participants were allowed to begin the survey. HPs were purposefully selected through relevant English National Health Service (NHS) organisations. HPs were deliberately selected from a wide range of relevant medical specialists, general practitioners and specialist nurses. Potential participants (1000 public and 400 HPs) were emailed with a description of the study and a link to the online survey and asked if they would be willing to take part. Public participants were offered a financial incentive of a £5 Amazon gift voucher after each round to improve recruitment. In Delphi exercises, 50 respondents is generally considered to be sufficient to be representative of public opinion and 30 respondents sufficient to be representative of expert opinion to enable consensus to be achieved [20-25]. A drop-out rate of 20% was expected over the 3 rounds, as this is found to be normal in other studies [25, 26]. Therefore, we sought to recruit 75 members of the public and 50 HPs to be able to achieve the target sample size at the end of 3 rounds.

### Survey development

The survey was developed by the research team with input from an external advisory panel comprising national experts in bio-ethics, medicine and Delphi methodology. Based on our review of the literature, we developed three general topic areas relevant to the proposed screening programme: stigma and sensitivity, the use of computer selection (risk stratification) algorithms/programs for BBV screening, and patient consent. To illustrate issues in each area, we wrote a number of clinical vignettes, an approach to Delphi used previously to explore ethical dilemmas [23]. The vignettes comprised short hypothetical scenarios encompassing the general

1  
2  
3 topic areas that may be experienced by the public and health practitioners (see supplementary file)  
4  
5 followed by a series of statements. Two statements were constructed for each question, in order to  
6  
7 balance negative and positive responses. Participants were asked to rate each statement using a 4-  
8  
9 point Likert scale with a response of 'strongly agree', 'agree', 'disagree' and 'strongly disagree.'  
10  
11 Statements were assessed by the advisory panel for readability and relevance.  
12

### 13 14 **Data collection**

15  
16  
17 Data were collected over three rounds; the process is summarised in Figure 1. Round 1 responses  
18  
19 were analysed, and areas requiring further investigation in Round 2 were identified. Feedback from  
20  
21 Rounds 1 and 2 was provided to the participants, with pie charts indicating group consensus and  
22  
23 disagreement as well as the respondents' original answers. Respondents were then asked to  
24  
25 reconsider the original answer in light of the group's responses.  
26  
27

28  
29 Free text comment boxes were provided at the end of each section for participants to provide any  
30  
31 further comments, and we gathered data on participants' age, gender and ethnicity. To help  
32  
33 participants understand the proposed BBV screening programme, we embedded a link in the online  
34  
35 survey to an informational YouTube video developed by DC [27].  
36  
37

### 38 39 **Data analysis**

40  
41 Following completion of the third and final round responses were analysed to establish areas of  
42  
43 consensus and areas where consensus had not been achieved. In the final analysis percentages were  
44  
45 narrowed down to agree (strongly agree and agree) and disagree (strongly disagree and disagree);  
46  
47 percentages of agree/disagree were calculated for each statement using SPSSv10. Consensus was  
48  
49 defined as >70% of participants agreeing/strongly agreeing or disagreeing/strongly disagreeing with  
50  
51 each statement; this percentage is recommended to achieve general consensus [25, 28, 29]. A  
52  
53 modified continuous comparative method of thematic analysis was used to analyse the free text  
54  
55  
56  
57  
58  
59  
60

comments in order to identify themes, allowing the determination of whether a comment made by one participant was a commonly shared or individual opinion [30].

## RESULTS

In Round 1, a total of 119 participants (68 public and 51 HP participants) were recruited; in Round 2, 51 public and 40 HPs completed the survey; in Round 3, 46 public and 37 HPs completed the survey. Within the final sample of HP respondents 55% were hospital doctors, 23% general practitioners and 12% specialist nurses; Table 1 shows the demographic data collected for the public and HP participants. Table 2 summarises consensus achieved in all three rounds, and Table 3 summarises common themes collected from all the participants free text comments.

| Socio-demographic Questions     | Public (n=46) | HP (n=37) |
|---------------------------------|---------------|-----------|
| <b>AGE (years)</b>              |               |           |
| Age Range (years)               | 20-73         | 29-61     |
| Mean Age (years)                | 33            | 44        |
| <b>GENDER</b>                   |               |           |
| Male                            | 21 (46%)      | 22 (59%)  |
| Female                          | 25 (54%)      | 15 (41%)  |
| <b>ETHNICITY (self-defined)</b> |               |           |
| White British                   | 33 (72%)      | 31 (84%)  |
| Asian                           | 7 (15%)       | 3 (8.5%)  |
| Indian                          | 3 (7%)        | 1 (2.5%)  |
| Chinese                         | 1 (2%)        | 1 (2.5%)  |
| American                        | 2 (4%)        | 0         |
| African                         | 0             | 1 (2.5%)  |

**Table 1. Participants' demographic data**

| STATEMENT                     | ROUND 1 |     |          |     | ROUND 2 |     |          |     | ROUND 3 |     |          |     |
|-------------------------------|---------|-----|----------|-----|---------|-----|----------|-----|---------|-----|----------|-----|
|                               | AGREE   |     | DISAGREE |     | AGREE   |     | DISAGREE |     | AGREE   |     | DISAGREE |     |
|                               | Public  | HPs | Public   | HPs | Public  | HPs | Public   | HPs | Public  | HPs | Public   | HPs |
| <b>Stigma and sensitivity</b> |         |     |          |     |         |     |          |     |         |     |          |     |

|                                                                                                                                                                                            |     |     |     |     |     |     |     |      |     |     |     |      |
|--------------------------------------------------------------------------------------------------------------------------------------------------------------------------------------------|-----|-----|-----|-----|-----|-----|-----|------|-----|-----|-----|------|
| 1. HIV tests should no longer have a special status and should be handled like any other routine blood tests                                                                               | 85% | 75% | 15% | 25% | 80% | 84% | 20% | 16%  | 80% | 88% | 20% | 12%  |
| 2. Because having HIV may make people feel they have a stigma, HIV tests should only be carried out in cases where the doctor will not offend the patient                                  | 57% | 6%  | 43% | 94% | 60% | 0%  | 40% | 100% | 60% | 2%  | 40% | 98%  |
| 3. It is acceptable for a health practitioner not to recommend that a patient has a HIV test if the health practitioner feels too uncomfortable                                            | 40% | 2%  | 60% | 98% | 41% | 0%  | 59% | 100% | 41% | 0%  | 59% | 100% |
| <b>The use of computer selection programmes for screening</b>                                                                                                                              |     |     |     |     |     |     |     |      |     |     |     |      |
| 4. The BBV screening programme is acceptable because detecting infections more often will benefit not only individual patients but also the wider community                                | 75% | 67% | 25% | 33% | 78% | 69% | 22% | 31%  | 78% | 75% | 22% | 25%  |
| 5. The BBV screening programme is not acceptable because it tests people for BBVs without their consent                                                                                    | 51% | 53% | 49% | 47% | 57% | 63% | 43% | 37%  | 57% | 70% | 43% | 30%  |
| 6. The computer programme should not be able to use information on the patient (for example age, post code or results of a previous test) to select blood samples for BBV testing          | 60% | 45% | 40% | 55% | 49% | 26% | 51% | 74%  | 49% | 22% | 51% | 78%  |
| 7. A screening programme for BBV infections would help remove the burden of having to identify and counsel patients for HIV and BBV testing                                                | 76% | 49% | 34% | 51% | 75% | 37% | 25% | 63%  | 75% | 32% | 25% | 68%  |
| 14. Assuming patients' data were fully secure, a screening programme for BBV infections should be able to use patient information to select those most at risk of infections for screening | -   | -   | -   | -   | 74% | 84% | 26% | 16%  | 72% | 98% | 28% | 2%   |

|                                                                                                                                                                                                          |     |     |     |     |     |     |     |     |            |            |     |            |
|----------------------------------------------------------------------------------------------------------------------------------------------------------------------------------------------------------|-----|-----|-----|-----|-----|-----|-----|-----|------------|------------|-----|------------|
| 15. A screening programme for BBV infections should not be allowed to use patient information to select those at most risk of infections even assuming the data was fully secure                         | -   | -   | -   | -   | 63% | 16% | 37% | 84% | 63%        | 6%         | 37% | <b>94%</b> |
| <b>Patient consent</b>                                                                                                                                                                                   |     |     |     |     |     |     |     |     |            |            |     |            |
| 8. Posters and leaflets informing patients that they may be screened for BBV infections is an acceptable way to get consent                                                                              | 70% | 53% | 30% | 47% | 57% | 42% | 43% | 58% | 57%        | 35%        | 43% | 65%        |
| 9. Using posters and leaflets is not enough. The health practitioner should still speak to patients and tell them that their blood may be tested for BBV infections and get their fully informed consent | 83% | 74% | 17% | 26% | 80% | 84% | 20% | 16% | <b>80%</b> | <b>85%</b> | 20% | 15%        |
| 10. Any loss in patient choice is outweighed by the benefit of having infections diagnosed earlier                                                                                                       | 75% | 51% | 25% | 49% | 71% | 26% | 29% | 74% | <b>71%</b> | 32%        | 29% | 68%        |
| 11. There is not adequate information for a patient to decline BBV testing for this screening programme                                                                                                  | 68% | 39% | 32% | 61% | 67% | 47% | 33% | 53% | 67%        | 42%        | 33% | 58%        |
| 12. Offering a mix of types of consent to patients getting routine blood tests is more acceptable than offering limited consent only                                                                     | 85% | 90% | 15% | 10% | 75% | 84% | 25% | 16% | <b>75%</b> | <b>90%</b> | 25% | 10%        |
| 13. Even though it may cost more money overall, offering a mix of types of consent to patients getting routine blood tests is the most acceptable way of getting consent                                 | 78% | 86% | 22% | 14% | 75% | 84% | 25% | 16% | <b>75%</b> | <b>90%</b> | 25% | 10%        |
| 16. This system of informing patients of the screening programme and permitting opt-out is sufficient for ensuring limited consent and patient awareness                                                 | -   | -   | -   | -   | 69% | 68% | 31% | 32% | 59%        | 62%        | 41% | 38%        |

|                                                                                                                                                                                                                                            |   |   |   |   |     |     |     |     |     |            |     |     |
|--------------------------------------------------------------------------------------------------------------------------------------------------------------------------------------------------------------------------------------------|---|---|---|---|-----|-----|-----|-----|-----|------------|-----|-----|
| 17. This system is not sufficient for ensuring patients are aware their blood may be tested. All patients undergoing blood tests should also be asked to agree to taking part in the screening programme by a doctor or nurse practitioner | - | - | - | - | 73% | 53% | 27% | 47% | 63% | <b>73%</b> | 37% | 27% |
|--------------------------------------------------------------------------------------------------------------------------------------------------------------------------------------------------------------------------------------------|---|---|---|---|-----|-----|-----|-----|-----|------------|-----|-----|

**Table 2. Frequency of responses to the survey**  
\*percentage figures in bold indicate where consensus was achieved

| Stigma and Sensitivity                               |                                                                                                                                                                                                                                                                                                                                                                                                                                                                               |
|------------------------------------------------------|-------------------------------------------------------------------------------------------------------------------------------------------------------------------------------------------------------------------------------------------------------------------------------------------------------------------------------------------------------------------------------------------------------------------------------------------------------------------------------|
| <b>Public</b>                                        | <p><i>"It should be carried out like any normal blood test...then the doctor couldn't be offending anyone or be embarrassed"</i></p> <p><i>"The stigma surrounding HIV would be reduced if HIV blood tests become more routine"</i></p>                                                                                                                                                                                                                                       |
| <b>HP</b>                                            | <p><i>"I feel there is a need for the position of testing to be brought in line with all other tests"</i></p> <p><i>"HIV testing would become more routine if it were offered more often"</i></p>                                                                                                                                                                                                                                                                             |
| The use of computer selection programs for screening |                                                                                                                                                                                                                                                                                                                                                                                                                                                                               |
| <b>Public</b>                                        | <p><i>"I don't feel comfortable with patients being selected based on age and post code...it's acceptable for tests to be run based on prior results"</i></p> <p><i>"I believe that implementing it would be a tremendous service if applied ethically and sensitively"</i></p> <p><i>"If data is secured and patients aware then it should be allowed"</i></p>                                                                                                               |
| <b>HP</b>                                            | <p><i>"We need universal not targeted screening"</i></p> <p><i>"If we are saying that anyone can get these infections, then surely we should check everyone"</i></p> <p><i>"Testing on the basis of age etc. will miss a large proportion of the population"</i></p>                                                                                                                                                                                                          |
| Patient consent                                      |                                                                                                                                                                                                                                                                                                                                                                                                                                                                               |
| <b>Public</b>                                        | <p><i>"While the BBV programme is in the public interest, it is vital that efforts are made to inform patients of what is happening"</i></p> <p><i>"As long as the patients are fully informed there is no problem"</i></p> <p><i>"A mixture of consent and acting in the best interests of the patient would be one of the best methods to ensure wide acceptability of the programme"</i></p>                                                                               |
| <b>HP</b>                                            | <p><i>"People are careened for many illnesses without fully informed consent, BBV should be no different"</i></p> <p><i>"Akin to random testing for diabetes, you may inform the patient that the test is happening but would not necessarily discuss all the subsequent effects and treatments"</i></p> <p><i>"I am sure that as patients become more aware of this happening to their bloods, they will be more accepting of it and ultimately see it as 'routine'"</i></p> |

**Table 3. Common themes from participants' free text comments.**



### **Stigma and sensitivity**

There was clear consensus for this section. The public and HPs agreed that HIV should no longer have a special status and should be handled like any other routine blood tests. In response to Question 3 HPs unanimously disagreed that feelings of discomfort or offending patients was an acceptable reason not to offer HIV tests.

### **The use of computer selection programs for screening**

The public and HPs both agreed that a BBV screening programme would detect infections more often and would be beneficial to individual patients and society more widely. However, HPs contradicted themselves by also agreeing that the BBV screening programme was not acceptable as it 'tested patients without their consent.' Despite this HPs felt that computer programmes should be able to use patients' information for risk stratification. Similarly, the public agreed that the screening programme would help to remove the burden of identifying and counselling patients. Free text comments from Round 1 generally supported the concept of using patient data for risk stratification, so long as there were safeguards to ensure data were secure. In Round 2, a follow up question (statements 14 and 15) confirmed that use of patient data for these purposes would be acceptable assuming data were secure.

### **Patient consent**

Consensus was achieved in both groups on the point that it was not enough to inform patients that they may be tested for BBVs via a poster or leaflets alone. Both the public and the HPs agreed that getting fully-informed consent for BBV testing was ideal. However, the public also agreed that any loss in patient choice (i.e. autonomy) would be outweighed by having infections diagnosed earlier. For the option to offer a mix of consent options, rather than limited consent alone, the answers were irreconcilable, with the majority of both groups agreeing with the two opposing statements. However, this likely instead reflects views that reducing health care costs should not be prioritized

1  
2  
3 over obtaining sufficient consent. Free text comments in this section mostly supported the proposed  
4  
5 consent process, but emphasised the need for all patients to be informed that their blood samples  
6  
7 might be tested. Two new statements (16 and 17) were added in Round 2 to try and establish  
8  
9 consensus regarding the proposed method of consent. There was consensus amongst HPs that  
10  
11 patients should still be informed their blood might be tested for BBVs at the point of drawing blood.  
12  
13

## 14 **DISCUSSION**

15  
16  
17 This study was developed to examine attitudes of the public and HPs towards two mechanisms of  
18  
19 improving detection of HIV and BBV infections, the use of risk stratification algorithms to detect  
20  
21 patients at higher risk of infection, and limited consent. We used an iterative Delphi technique with  
22  
23 the addition of new statements in subsequent rounds to clarify issues raised after responses to prior  
24  
25 statements. We found there was general agreement amongst both participant groups around  
26  
27 ending any persisting exceptionalism in relation to HIV testing. There was also consensus that a BBV  
28  
29 screening programme would be beneficial and it was reasonable to use patients' medical data to  
30  
31 target those at higher risk of infection, assuming data were protected.  
32  
33

34  
35 In respect to our investigation of a modified consent process, there was some ambiguity within both  
36  
37 groups. Therefore consensus on this point was not easily discernible, indicating this form of consent  
38  
39 posed some ethical dilemma. However, through iteration of rounds and use of free text boxes, a  
40  
41 new and acceptable form of a consent process emerged from this Delphi study. We call this process  
42  
43 'limited consent' which involves providing advanced notification to all patients that their blood may  
44  
45 be tested, with a reminder from a HP when blood is drawn, along with the option of opting out. This  
46  
47 Delphi study achieved a national English sample from a range of HPs involved in BBV testing and the  
48  
49 general public. Its finding of acceptability of a novel consent procedure, and implications for the  
50  
51 development of a new BBV screening programme, however may be applicable only to the English  
52  
53 social context.  
54  
55  
56  
57  
58  
59  
60

1  
2  
3 Given the apparent sensitivity that still exists around offering HIV testing, it is interesting that both  
4  
5 public participants and a varied range of medical and nursing HPs were comfortable with the  
6  
7 concept of not only reducing the exceptionalism that has traditionally been associated with HIV  
8  
9 testing, but also with the concept of prior consent. In devising the statements in the survey, we  
10  
11 deliberately wanted to test how far each group might consider balancing the primacy of patients'  
12  
13 autonomy, in terms of deciding whether to be tested for BBVs, over the competing ethical principal  
14  
15 of utilitarianism. The utilitarian argument in favour of universal or targeted screening for BBVs is that  
16  
17 society as a whole benefits if more people are diagnosed with BBV infections since transmission is  
18  
19 reduced, fewer individuals are infected and healthcare costs are reduced.  
20  
21

22  
23 Unlike some other screening programmes, the benefits of the proposed BBV screening programme  
24  
25 would extend more widely than to just those individuals found to be infected with BBVs. Another  
26  
27 significant difference is that given the frequency with which patients in general have blood tests, and  
28  
29 potential uncertainty of which patients would be tested using risk stratification algorithms, obtaining  
30  
31 specific and direct consent for testing each time a patient has blood drawn is impractical. Hence  
32  
33 obtaining prior consent from the target adult population with the clear option of opting out of  
34  
35 testing may prove both practical as well as acceptable based on our study.  
36  
37

38  
39 There is a precedent for this form of consent in the UK Clinical Practice Research Database [31],  
40  
41 where all adults in the areas contributing medical data to this system are informed by letter that  
42  
43 their fully-anonymised data may be used for research studies or service planning unless they decide  
44  
45 to 'opt-out' of the system. One recent study screening for BBVs in Emergency Departments has also  
46  
47 successfully employed a pragmatic and limited consent process [16]. The use of risk stratification  
48  
49 software to identify patients at higher risk of BBV infections has recently been employed in the UK-  
50  
51 based HepCATT trial, as part of targeted case finding for hepatitis C infection in primary care [32].  
52  
53

54 We believe that combining such risk stratification software to target screening with a practical and  
55  
56 acceptable consent process has considerable potential to reduce the number of individuals with  
57  
58  
59  
60

1  
2  
3 undiagnosed BBVs in countries with suitable health infrastructure. Further research into its design  
4  
5 and implementation would be needed.  
6  
7

8 A recent UK study found that adding HBV/HCV tests to routine HIV tests in Emergency Departments  
9  
10 resulted in significant numbers of new diagnoses of viral hepatitis as well as HIV, with the cost per  
11  
12 new diagnosis well below the threshold for cost-effectiveness [13]. This adds weight to the concept  
13  
14 of screening specific or general populations for all three BBVs, rather than just HIV. Changing to the  
15  
16 new consent process led to testing rates increasing from below 5% of all patients to consistently  
17  
18 over 60% with mean numbers of positive results increasing from less than 1 per week to 4 per week  
19  
20 [16].  
21  
22

23  
24 The process of obtaining consent in the present study may be viewed as a paradigm for future  
25  
26 screening programmes or studies exploring alternative approaches to increase BBV testing. Our  
27  
28 study adds to the evidence suggesting that both the public as well as HPs may be willing to accept  
29  
30 prior consent, where HPs do not need to obtain specific consent for HIV or BBV testing, given the  
31  
32 benefits of earlier diagnosis of BBV infections both to individuals as well as society in general.  
33

34  
35 Nonetheless there are potential challenges in implementing such a system of prior consent for BBV  
36  
37 testing in terms of public policy or law. In the UK consent for medical tests and treatment or use of  
38  
39 medical data for specific purposes is required by common law [33], although in practice the precise  
40  
41 nature of most blood tests ordered by clinicians are not discussed in detail with patients. As such it  
42  
43 may be feasible to test such a screening programme without serious legal barriers. In other  
44  
45 countries where laws on consent and privacy relating to medical tests and use of data are different,  
46  
47 adoption of such a programme may prove more problematic.  
48  
49

## 50 **CONCLUSION**

51  
52  
53 This study has a number of strengths and limitations. The study used a Delphi consensus technique  
54  
55 allowing an iterative approach to achieve consensus in an area of public health with considerable  
56  
57 potential for ethical debate. We successfully recruited a broad range of healthcare workers and  
58  
59  
60

1  
2  
3 members of the public with a sample size appropriate to the methodology, thus producing a  
4  
5 nationally representative sample. However, the application of the study's findings are restricted to  
6  
7 the UK, given that other countries have different medicolegal systems in relation to consent and use  
8  
9 of data, although our methodology may be of interest to other countries considering a screening  
10  
11 programme. Another limitation is that the selection process for HP participants might have led to  
12  
13 self-selection bias. Whilst we attempted to send invitations to a broad range of specialists and  
14  
15 professionals for the HP survey, the topic might still have attracted more of those with strong views.  
16  
17 However, this is a selection bias that applies to any kind of questionnaire study and is not specific  
18  
19 only to our study.  
20  
21

22  
23 HIV related issues, such as treatment, and social stigma, have developed over the past couple of  
24  
25 decades, and associated BBV screening programmes should reflect these advances. This study found  
26  
27 that the special status of HIV testing in the UK may no longer be necessary today and is hindering  
28  
29 appropriate screening, and proposes a novel consent procedure that could be implemented in  
30  
31 future screening programmes in the UK. Our findings could be used to inform the development of  
32  
33 public policy that would facilitate such a BBV screening programme, as well as the development of  
34  
35 professional education in terms of reducing the social stigma associated with HIV and strengthening  
36  
37 communication between clinicians and their patients.  
38  
39

#### 40 41 **ACKNOWLEDGEMENTS** 42

43  
44 We are very grateful to the doctors, nurses and public participants who responded to our survey,  
45  
46 Charlotte Jacobs our study coordinator and Robbie Horton who developed the YouTube video. We  
47  
48 are indebted to the following expert advisors who assisted with the survey development and  
49  
50 interpretation of responses: Dr Alasdair MacSween, Teesside University; Dr Elaine Kirk, GP at NHS  
51  
52 England; Professor Rebecca Bennett, Manchester University, Professor Jackie Leach Scully,  
53  
54 Newcastle University; Neil Campling and Alex Murray.  
55  
56  
57  
58  
59  
60

**COMPETING INTERESTS**

No competing interests.

**FUNDING**

South Tees Infectious Diseases Research Fund (8072SA).**ETHICAL APPROVAL**

This study received ethical approval from the Durham University School of Medicine, Pharmacy and Health's Sub-Ethics Committee. All data were treated according to the Data Protection Act 1998.

**DATA SHARING STATEMENT**

No additional data available.

**CONTRIBUTORSHIP STATEMENT**

Denise Crane, Emily J Henderson and David R Chadwick were all responsible for the conception and design of this study, interpretation of the data, drafting, revising and approval of the final document. Denise Crane was responsible for recruitment of the participants, collection and analysis of the data.

**COPYRIGHT**

The Corresponding Author has the right to grant on behalf of all authors and does grant on behalf of all authors, a worldwide license to the Publishers and its licensees in perpetuity, in all forms, formats and media (whether known now or created in the future), to i) publish, reproduce, distribute, display and store the Contribution, ii) translate the Contribution into other languages, create adaptations, reprints, include within collections and create summaries, extracts and/or, abstracts of the Contribution, iii) create any other derivative work(s) based on the Contribution, iv) to exploit all subsidiary rights in the Contribution, v) the inclusion of electronic links from the Contribution to third party material where-ever it may be located; and, vi) licence any third party to do any or all of the above.

**TRANSPARENCY DECLARATION**

The lead author affirms that the manuscript is an honest, accurate, and transparent account of the study being reported; that no important aspects of the study have been omitted; and that any discrepancies from the study as planned (and, if relevant, registered) have been explained.

**REFERENCES**

1. Joint United Nation Programme on HIV/AIDS (UNAIDS). 90-90-90 UNAIDS - An Ambitious Treatment Target To Help End The AIDS Epidemic. UNAIDS; 2014.  
[http://www.unaids.org/sites/default/files/media\\_asset/90-90-90\\_en\\_0.pdf](http://www.unaids.org/sites/default/files/media_asset/90-90-90_en_0.pdf) (accessed 09.09.2016)
2. Moorman AC, Xing J, Ko S, *et al*. Late Diagnosis of Hepatitis C Virus Infection in the Chronic Hepatitis Cohort Study (CHeCS): Missed Opportunities for Intervention. *Hepatology* 2015; 61(5):1479-1484.
3. Niederau, C. Chronic hepatitis B in 2014: Great therapeutic progress, large diagnostic deficit. *World Journal of Gastroenterology* 2014; 20(33):11595-11617.
4. Cornberg M, Razavi HA, Alberti A, *et al*. A systematic review of hepatitis C virus epidemiology in Europe, Canada and Israel. *Liver International* 2011; 31(Suppl 2):30-60.
5. Health Protection Agency. Hepatitis C in the United Kingdom: 2013 Report. London: Health Protection Services; 2013.
6. Public Health England. Hepatitis C in the UK: 2013 report. London: Public Health England; 2013.  
[https://www.gov.uk/government/uploads/system/uploads/attachment\\_data/file/364074/Hepatitis\\_C\\_in\\_the\\_UK\\_2013.pdf](https://www.gov.uk/government/uploads/system/uploads/attachment_data/file/364074/Hepatitis_C_in_the_UK_2013.pdf) (accessed 09.09.2016)

- 1  
2  
3 7. O’Leary MC, Sarwar M, Hutchinson SJ, *et al.* The prevalence of hepatitis C virus among  
4  
5 people of South Asian origin in Glasgow – Results from a community based survey and  
6  
7 laboratory surveillance. *Travel Medicine and Infectious Disease* 2013; 11(5):301-309.  
8  
9
- 10 8. McPherson S, Valappil M, Moses SE, *et al.* Targeted case finding for hepatitis B using dry  
11  
12 blood spot testing in the British-Chinese and South Asian populations of the North-East of  
13  
14 England. *Journal of Viral Hepatitis* 2013; 20(9):638-644.  
15  
16
- 17 9. Stein N. Ethics in consent for HIV testing. *The virtual mentor VM* 2009; 11(12):959-961.  
18  
19
- 20 10. Bayer R, Fairchild AL. Changing the paradigm for HIV testing – The end of exceptionalism.  
21  
22 *New England Journal of Medicine* 2006; 355(7):647-649.  
23  
24
- 25 11. General Medical Council (GMC). Confidentiality: Protecting and Providing Information  
26  
27 (2000). GMC-UK-org 2004.  
28  
29  
30 [http://www.gmc-uk.org/confidentiality\\_sep\\_2000.pdf\\_25416426.pdf](http://www.gmc-uk.org/confidentiality_sep_2000.pdf_25416426.pdf) (accessed 09.09.2016)  
31  
32
- 33 12. General Medical Council (GMC). Consent: patients and doctors making decisions together.  
34  
35 GMC-UK.org 2008.  
36  
37  
38 [http://www.gmc-uk.org/static/documents/content/Consent\\_-\\_English\\_1015.pdf](http://www.gmc-uk.org/static/documents/content/Consent_-_English_1015.pdf) (accessed  
39  
40 09.09.2016)  
41  
42
- 43 13. Orkin C, Flanagan S, Wallis E, *et al.* Incorporating HIV/hepatitis B virus/hepatitis C virus  
44  
45 combined testing into routine blood tests in nine UK Emergency Departments: the “Going  
46  
47 Viral” campaign. *HIV Medicine* 2016; 17(3):222-230.  
48  
49
- 50 14. Elmahdi R, Gerver SM, Guillen GG, *et al.* Low levels of HIV test coverage in clinical settings in  
51  
52 the UK: a systematic review of adherence to 2008 guidelines. *Sexually Transmitted Infections*  
53  
54 2014; 90(2):119-124.  
55  
56  
57  
58  
59  
60



- 1  
2  
3 15. Hartney T, Kennedy I, Crooke P, *et al.* Expanded HIV testing in high prevalence areas in  
4  
5 England: results of a 2012 audit of sexual health commissioners. *HIV Medicine* 2014;  
6  
7 15(4):251-254.  
8  
9  
10 16. Paparello J, Hunter L, Betournay R, *et al.* Reducing the barriers to HIV testing – a simplified  
11  
12 consent pathway increases the uptake of HIV testing in a high prevalence population. *HIV*  
13  
14 *Medicine* 2016; 17(Suppl 1):9.  
15  
16  
17 17. British HIV Association (BHIVA), British Association of Sexual Health and HIV (BASHH), British  
18  
19 Infection Society (BIS). UK National Guideline for HIV testing 2008. BHIVA.org 2008.  
20  
21 <http://www.bhiva.org/documents/Guidelines/Testing/GlinesHIVTest08.pdf> (accessed  
22  
23 09.09.2016)  
24  
25  
26  
27 18. <http://www.nhs.uk/conditions/Blood-tests/Pages/Introduction.aspx> (accessed 09.09.2016)  
28  
29  
30  
31 19. Jones J, Hunter D. Consensus methods for medical and health services research. *The British*  
32  
33 *Medical Journal* 1995; 311:376-380.  
34  
35  
36 20. [http://www.journalslibrary.nihr.ac.uk/\\_data/assets/pdf\\_file/0003/64839/FullReport-](http://www.journalslibrary.nihr.ac.uk/_data/assets/pdf_file/0003/64839/FullReport-hta2030.pdf)  
37  
38 [hta2030.pdf](http://www.journalslibrary.nihr.ac.uk/_data/assets/pdf_file/0003/64839/FullReport-hta2030.pdf) (accessed 09.09.2016)  
39  
40  
41 21. Cook S, Aikens JE, Berry CA, *et al.* Development of the Diabetes Problem-Solving Measure for  
42  
43 Adolescents. *Diabetes Educator* 2001; 27(6):865-874.  
44  
45  
46 22. Rose CM, Kagan AR. The final report of the expert panel for the Radiation Oncology Bone  
47  
48 Metastasis Work Group of the American College of Radiology. *International Journal of*  
49  
50 *Radiation Oncology Biology Physics* 1998; 40(5):1117-1124.  
51  
52  
53 23. Wainwright P, Gallagher A, Tompsett H, *et al.* The use of vignettes within a Delphi exercise: a  
54  
55 useful approach in empirical ethics? *Journal of Medical Ethics* 2010; 36(11):656-660.  
56  
57  
58  
59  
60

- 1  
2  
3 24. Wigton RS, Darr CA, Corbett KK, *et al.* How do community practitioners decide whether to  
4  
5 prescribe antibiotics for acute respiratory tract infections? *Journal of General Internal*  
6  
7 *Medicine* 2008; 23(10):1615-1620.  
8  
9  
10 25. Henderson EJ, Rubin GP. Development of a community based model for respiratory care  
11  
12 services. *BMC Health Services Research* 2012; 12:193.  
13  
14  
15 26. Akins RB, Tolson H, Cole BR. Stability of response characteristics of a Delphi panel:  
16  
17 application of bootstrap data expansion. *BMC Medical Research Methodology* 2005; 5:37.  
18  
19  
20 27. <https://www.youtube.com/watch?v=llSsgKsoAKM> (accessed 09.09.2016)  
21  
22  
23 28. Diamond IR, Grant RC, Feldman BM, *et al.* Defining consensus: a systematic review  
24  
25 recommends methodological criteria for reporting Delphi studies. *Journal of Epidemiology.*  
26  
27 2014; 67:401-409.  
28  
29  
30 29. Slade SC, Dionne CE, Underwood M, *et al.* Standardised method for reporting exercise  
31  
32 programmes: protocol for a modified Delphi study. *BMJ Open.* 2014; 4:e006682.  
33  
34  
35 30. Glaser BG, Strauss AL. The Discovery of Grounded Theory: strategies for qualitative research.  
36  
37 Chicago: Aldine. 1967.  
38  
39  
40 31. The Clinical Practice Research Datalink (CPRD) opt-out system for members of the public.  
41  
42  
43 <https://www.cprd.com/membersofpublic/> (accessed 09.09.2016)  
44  
45  
46  
47 32. Roberts K, Macleod J, Metcalfe C, *et al.* Hepatitis C - Assessment to Treatment Trial  
48  
49 (HepCATT) in primary care: study protocol for a cluster randomised controlled trial. *Trials*  
50  
51 2016; 17(1):366.  
52  
53  
54  
55  
56  
57  
58  
59  
60

1  
2  
3  
4  
5  
6  
7  
8  
9  
10  
11  
12  
13  
14  
15  
16  
17  
18  
19  
20  
21  
22  
23  
24  
25  
26  
27  
28  
29  
30  
31  
32  
33  
34  
35  
36  
37  
38  
39  
40  
41  
42  
43  
44  
45  
46  
47  
48  
49  
50  
51  
52  
53  
54  
55  
56  
57  
58  
59  
60

33. [http://www.qmc-uk.org/guidance/ethical\\_guidance/consent\\_guidance\\_common\\_law.asp](http://www.qmc-uk.org/guidance/ethical_guidance/consent_guidance_common_law.asp) (accessed 17.03.2017)

For peer review only

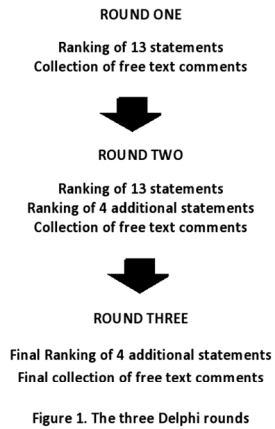

Figure 1. The three Delphi rounds

437x618mm (72 x 72 DPI)

Supplementary File 1: Table of Vignettes used in the online survey.

|                                                                                                                                                                                                                                                                                                                                                                                                                                                                                                                                                                                                                                                                                                                                                                                                                                                                                                                                                                                                                                                                                                                                                                                                                                                                                                                                                                                                                                                                                                                                                                                                                                                                                                                                                                                                                                                                                                                                                                                                                                                                                                                                    |
|------------------------------------------------------------------------------------------------------------------------------------------------------------------------------------------------------------------------------------------------------------------------------------------------------------------------------------------------------------------------------------------------------------------------------------------------------------------------------------------------------------------------------------------------------------------------------------------------------------------------------------------------------------------------------------------------------------------------------------------------------------------------------------------------------------------------------------------------------------------------------------------------------------------------------------------------------------------------------------------------------------------------------------------------------------------------------------------------------------------------------------------------------------------------------------------------------------------------------------------------------------------------------------------------------------------------------------------------------------------------------------------------------------------------------------------------------------------------------------------------------------------------------------------------------------------------------------------------------------------------------------------------------------------------------------------------------------------------------------------------------------------------------------------------------------------------------------------------------------------------------------------------------------------------------------------------------------------------------------------------------------------------------------------------------------------------------------------------------------------------------------|
| <p><b>Stigma and sensitivity</b></p>                                                                                                                                                                                                                                                                                                                                                                                                                                                                                                                                                                                                                                                                                                                                                                                                                                                                                                                                                                                                                                                                                                                                                                                                                                                                                                                                                                                                                                                                                                                                                                                                                                                                                                                                                                                                                                                                                                                                                                                                                                                                                               |
| <p><b>1)</b> A young man named John is suffering from repeated infections of oral thrush (candida in the mouth), and goes to see his GP for help. This health problem suggests to the GP that John may have an HIV infection. The GP knows if she wants to test her patient for an HIV infection she will need to explain to John why she wants to run the test and get John to consent (agree) to have the tests. This process is called <b>'fully-informed consent'</b>.<br/>HIV has a special status compared to routine blood tests, for example tests for anaemia (low iron in the blood) or diabetes (blood sugar levels). This is because a few decades ago HIV was not curable, and was associated with men who have sex with men and with injection drug users. Today we know anyone can get infected with HIV, and there are better medicines to help people with HIV still live long healthy lives. However, some people still believe there is a social stigma attached to HIV which means they think having HIV says something negative about the person who has it.<br/>The GP feels too busy and embarrassed to explain all this to John. She is not terribly familiar with HIV and does not want to offend the patient by suggesting he might have HIV. She decides not to offer John an HIV test.</p>                                                                                                                                                                                                                                                                                                                                                                                                                                                                                                                                                                                                                                                                                                                                                                                                             |
| <p><b>The use of computer selection programmes for screening</b></p>                                                                                                                                                                                                                                                                                                                                                                                                                                                                                                                                                                                                                                                                                                                                                                                                                                                                                                                                                                                                                                                                                                                                                                                                                                                                                                                                                                                                                                                                                                                                                                                                                                                                                                                                                                                                                                                                                                                                                                                                                                                               |
| <p><b>2)</b> A hospital tends to detect blood-borne virus (BBV) infections like HIV later compared to the rest of the country. This hospital is considering a BBV screening programme to help increase detection of infection. As with all hospitals, at this hospital there are patients who get routine blood tests, for example tests for anaemia if the patient is feeling tired or blood sugar levels to check for diabetes. The hospital wants to test all these routine blood samples for BBV infections.<br/>A computer programme would first select blood samples that have a high chance of being infected with a BBV. It would do this by using information such as a patient's age or post code of where they live, or results of previous tests that suggest someone may also have a BBV infection, such as abnormal liver tests. Then a laboratory worker would carry out the tests for BBV infections. If the test results are positive, then a health practitioner would tell the patient. Otherwise, patients would never know their blood had been tested unless their result was positive.</p> <p><b>3)</b> Computer systems in GP surgeries and hospitals currently use information on patients to select certain patients for tests or screening, based on their age and diseases they suffer from (this process of screening is in line with guidance from the National Institute of Health and Care Excellence. For example a GP surgery might select men and women over 45 years to check their cholesterol or blood pressure, and patients taking certain medications that require regular blood tests. In each of these situations the computer systems are selecting patients based on certain risk factors (e.g. age) to target those at higher risk of disease and improve the cost-effectiveness of the screening system. Current national guidelines for doctors also recommend universal testing for HIV in certain areas of the country where HIV is common. Hence the area where a patient lives is already currently being used as a criterion for whether they are screened for infection.</p> |
| <p><b>Patient consent</b></p>                                                                                                                                                                                                                                                                                                                                                                                                                                                                                                                                                                                                                                                                                                                                                                                                                                                                                                                                                                                                                                                                                                                                                                                                                                                                                                                                                                                                                                                                                                                                                                                                                                                                                                                                                                                                                                                                                                                                                                                                                                                                                                      |
| <p><b>4)</b> Some health practitioners feel too uncomfortable or busy to inform patients that their blood sample may be tested for BBV infections and get the patient's <b>fully-informed consent</b>. This belief may cause practitioners to decide not to test for BBV infections, which means some patients may not ever learn they are infected.<br/>Other ways of dealing with this issue have been suggested. For example, posters could be hung in the surgery or waiting room informing patients that their blood may be tested for BBV infections. Health practitioners could also hand out information leaflets to patients when their blood sample is being taken. It is then up to the patient to say they <b>do not</b> want to take part in the screening, or <b>'opt out'</b>, by telling the receptionist or phoning a telephone number. This type of consent, since not <b>fully-informed</b>, is described as <b>limited consent</b>. With limited consent, the patient's right to decide what happens in their health care is reduced, compared to fully-informed consent.</p>                                                                                                                                                                                                                                                                                                                                                                                                                                                                                                                                                                                                                                                                                                                                                                                                                                                                                                                                                                                                                                  |

1  
2  
3  
4  
5  
6  
7  
8  
9  
10  
11  
12  
13  
14  
15  
16  
17  
18  
19  
20  
21  
22  
23  
24  
25  
26  
27  
28  
29  
30  
31  
32  
33  
34  
35  
36  
37  
38  
39  
40  
41  
42  
43  
44  
45  
46  
47  
48  
49  
50  
51  
52  
53  
54  
55  
56  
57  
58  
59  
60

5) Here we present a different approach to BBV screening and consent, described in the following story. A hospital in London has high levels of BBV infections in the local population and decides to run a new programme to help lower the levels of BBVs. Everyone aged 18-70 years old attending the A&E department who needs a routine blood test is also offered tests for the three BBVs (HIV, Hepatitis B and Hepatitis C) by the doctor or nurse treating them. Most patients agree to the tests with little discussion, and some choose to refuse the offer. However, there are still a few patients who ask further questions which means health practitioners need to provide counselling about the tests and what will happen if any tests are positive. The counselling takes additional staff time, this costs the hospital a lot more money. This form of consent is a **mix of fully-informed consent and limited (opt-out) consent**, depending on what the patients wants.

6) A Clinical Commissioning Group (CCG) covering general practices in a rural and semi-urban area decides to pilot a BBV screening programme similar to that proposed in the video you watched. In this area a lot of patients come to see their GP with symptoms too late, and already suffer with complications of BBV infections. They choose to inform all adults in the area about the screening programme by letter, including details of how to opt out of the programme if they prefer not to be screened. They also ensure that all surgeries have posters reminding patients about the programme and that health professionals taking blood samples remind patients about it and give them a leaflet detailing how they can opt out. As well as a telephone number they can call to opt out, patients can also inform the surgery receptionists who will arrange for them to opt out.
